1 **Distinct gut and vaginal microbiota profile in women with Recurrent**  
2 **Implantation Failure and Unexplained Infertility**

3 **Author details**

4  
5 Nayna Patel<sup>1</sup>, Nidhi Patel<sup>2</sup>, Sejal Pal<sup>1</sup>, Neelam Nathani<sup>2</sup>, Ramesh Pandit<sup>2</sup>, Molina  
6 Patel<sup>1</sup>, Niket Patel<sup>1</sup>, Chaitanya Joshi<sup>2</sup> and Bhavin Parekh<sup>1\*</sup>

7  
8 1. Akanksha Hospital and Research Institute, Lambhvel Road, Lambhvel, Anand,  
9 Gujarat 387310, India.

10  
11 2. Gujarat Biotechnology Research Centre (GBRC), Gandhinagar, Gujarat,  
12 382011, India.

13  
14 \*Correspondence: [bp258@cantab.net](mailto:bp258@cantab.net)

15

16

17

18

19

20

21

22

23 **Background:** Implantation failure limits the success rate of natural and *in*  
24 *vitro* fertilization (IVF)-assisted conceptions. Evidence suggests dysbiosis in the  
25 female reproductive tract impacts implantation failure. However, whether gut  
26 dysbiosis influences implantation failure and whether it accompanies reproductive  
27 tract dysbiosis remains unexplored.

28 **Method:** We recruited 11 fertile women as the controls, and a cohort of 20 women  
29 diagnosed with implantation-failure associated infertility, which included 10  
30 women diagnosed with recurrent implantation failure (RIF), and 10 women  
31 diagnosed with unexplained infertility (UE). Using next-generation amplicon  
32 sequencing, we compared the diversity, structure, and composition of fecal and  
33 vaginal bacteria of the controls with that of the infertile cohort. While we  
34 sequenced fecal samples of all the participants (n=31), we could only  
35 sequence 8 vaginal samples in each group (n=24).

36 **Results:** Compared with the controls,  $\alpha$ -diversity of the gut bacteria, analysed by  
37 Chao 1 and Shannon indices, among the infertile groups declined ( $p < 0.05$ ).  $\beta$ -  
38 diversity between the controls and infertile cohort, measured by both Bray-Curtis  
39 and Jaccard distances, differed significantly ( $p < 0.05$ ). Taxa analysis of the gut  
40 bacteria revealed enrichment of Gram-positive bacteria, mainly of the  
41 phylum *Firmicutes*, in the RIF group. In contrast, Gram-negative bacteria were  
42 relatively more abundant in the UE group. Additionally, mucus-producing  
43 bacteria genera such as *Prevotella* and *Sutterella* declined in the infertile  
44 cohort ( $p < 0.05$ ). Intriguingly, significant enrichment ( $p < 0.05$ ) of the

45 genus *Hungatella*, associated with trimethylamine N-oxide (TMAO) production,  
46 occurred in the infertile cohort. Vaginal microbiota was dominated by *L.*  
47 *iners* across the groups, with the UE group showing the highest levels. Of the three  
48 groups, the RIF group had the least diverse vaginal microbiota. Taxa analysis  
49 showed higher levels of anaerobic bacteria such  
50 as *Leptotrichia*, *Snethia*, and *Prevotella* in the controls.

51 **Conclusion:** We posit that in the setting of the compromised gut mucosal barrier,  
52 the phyla *Firmicutes* generates TNF- $\alpha$ -driven systemic inflammation, leading to  
53 RIF, whereas an overload of Gram-negative bacteria induces IL-6-driven systemic  
54 inflammation, leading to UE. Additionally, *Hungatella*-induced elevation  
55 of TMAO levels causes platelet hypercoagulability, synergistically contributing to  
56 implantation failure. Finally, vaginal dysbiosis does not appear to co-occur with  
57 gut dysbiosis.

58

59

## 60 **1. Introduction**

61 Infertility, defined as a failure to conceive after 1 year of appropriately timed  
62 unprotected intercourse, is a distressing and costly reproductive disorder that  
63 affects up to 15% of couples globally (Kamel 2010). Some known causes of  
64 infertility include pelvic diseases, peritoneal factors, cervical factors, ovulatory  
65 disorders, reproductive aging of women, and male factors (Lindsay and Vitrikas  
66 2015).

67 Despite this knowledge, some couples are diagnosed as having unexplained  
68 infertility (UE) because the underlying mechanism(s) remain undefined even after  
69 assessment of ovulatory function, tubal patency, and sperm parameters (Bellver,  
70 Soares et al. 2008). Frustratingly, many of the infertile couples undergo multiple  
71 unsuccessful assisted reproduction technology (ART) cycles (i.e., IVF and/or  
72 intracytoplasmic sperm injection (ICSI)) and are thus diagnosed as having repeated  
73 implantation failure (RIF) (Bellver, Soares et al. 2008, Simon and Laufer 2012,  
74 Polanski, Baumgarten et al. 2014). Yet another subgroup of infertile couples,  
75 diagnosed as recurrent pregnancy loss (RPL), exists that conceive several times  
76 ( $\geq 3$ ), but miscarriage occurs each time before gestational week 28, although  
77 controversies exist on its definition (Christiansen, Nielsen et al. 2006, El Hachem,  
78 Crepaux et al. 2017). It has been argued that RIF and RPL represent the same  
79 condition spectrum (Christiansen, Nielsen et al. 2006).

80 Pathologies of all these enigmatic conditions converge on mechanisms by which  
81 the embryo fails to implant in the uterus—also called implantation failure  
82 (Graham, Seif et al. 1990, Christiansen, Nielsen et al. 2006, Bellver, Soares et al.  
83 2008, Simon and Laufer 2012). It is the main limiting factor for natural and *in vitro*  
84 fertilization (IVF)-assisted pregnancies (Bellver, Soares et al. 2008, Hernández-  
85 Vargas, Muñoz et al. 2020). Failed implantation involves a triumvirate of a poor  
86 quality embryo and an unreceptive endometrium and ill-timed embryo-  
87 endometrium interaction, of which unreceptive endometrium appears to be the  
88 most critical factor. (Simon and Laufer 2012). In fact, unreceptive endometrium  
89 has been implicated in two-thirds of all the failures (Simon and Laufer 2012).  
90 While multiple factors that disrupt endometrium receptivity, including steroidal  
91 hormonal imbalance, thrombotic abnormalities, hyperhomocysteinemia, and  
92 immune dysfunctions, have been identified, much remains recondite (Bellver,  
93 Soares et al. 2008, Simon and Laufer 2012, Cho, Kim et al. 2019).

94 The reproductive tract bacteria influence implantation failure of endometrial origin  
95 (Al-Nasiry, Ambrosino et al. 2020). For example, women with non-*Lactobacillus*-  
96 dominated microbiota in a receptive endometrium had decreased implantation rates  
97 than women with a *Lactobacillus*-dominated (>90%) microbiota (Moreno,  
98 Codoñer et al. 2016). Chlamydia species in the endocervix of women undergoing  
99 IVF-ET were correlated with implantation failure (Witkin, Sultan et al. 1994).

100 Increasingly researchers are exploring how the local microbiota influences  
101 physiology at distal sites, especially how the gut bacteria, the densest and most  
102 diverse bacterial communities of the body, impact distal organs, including the brain  
103 and lungs, leading to the notions of the gut-brain axis and gut–lung microbiota axis  
104 (Ravel and Brotman 2016, Budden, Gellatly et al. 2017). However, hitherto, gut  
105 bacteria’s role in implantation failure of endometrial origin remains unexplored, let  
106 alone the gut-reproductive tract microbiota axis, even though a compelling  
107 rationale exists. Indeed, the gut bacteria impact the immune system, hormonal  
108 homeostasis, and the coagulation system—all of which mediate implantation  
109 success (Alexander, Targan et al. 2014, Baker, Al-Nakkash et al. 2017, Vinchi  
110 2019). The comorbidity of gut disorders (e.g., celiac disease) with infertility  
111 disorders, including recurrent pregnancy loss, allude to a role of ‘gut-reproductive  
112 tract axis’ in implantation failure (Tersigni, D’Ippolito et al. 2018).

113 Hence we investigated whether gut dysbiosis occurs in women with implantation  
114 failure, and if so, whether it accompanies vaginal dysbiosis, which usually involves  
115 a decline in either the levels of *Lactobacillus* or protective species of *Lactobacillus*  
116 and a simultaneous rise in the diversity and density of other bacteria (Madhivanan,  
117 Alleyn et al. 2015, Amabebe and Anumba 2018, Wang, Fan et al. 2020). To this  
118 end, by using 16S rRNA gene sequencing, we compared the diversity, structure

119 and taxonomic composition of the fecal and vaginal microbiota of fertile women  
120 with that of infertile women with a history of RIF and UE.

## 121 **2. Materials and Methods**

### 122 **2.1 Study participants**

123 For this retrospective, single-center cohort study, fertile and infertile women,  
124 referred to Akanksha Hospital and Research Institute between September 2018 and  
125 February 2019, were recruited and divided into three groups: the control, RIF, and  
126 UE groups. The RIF group's inclusion criteria were women who could not  
127 conceive after  $\geq 2$  fresh IVF-embryo transfer cycles/ ICSI or had  $\geq 3$  consecutive  
128 miscarriages. UE was diagnosed if a cause remains undefined after our routine  
129 fertility tests with the following criteria: infertility of more than 1 year, normal  
130 male partner, normal menstrual rhythm with regular ovulation, and normal  
131 hormonal tests (i.e., thyroid, prolactin, AMH) Exclusion criteria included diabetes,  
132 polycystic ovary syndrome and endometriosis, diarrhea, ongoing pregnancy,  
133 addiction (e.g., drugs, alcohol, tobacco etc.) and the use of antibiotics within at  
134 least two weeks before sample collection. We performed all the sampling and  
135 experiments with the approval of the local Ethics Committee of Sat Kaival  
136 Hospital Pvt. Ltd (EC2013/053). Participants gave their oral and written informed  
137 consent for fecal and vaginal sample collections and subsequent microbiological  
138 analysis. We recorded and compared participants' characteristics (**Table 1**).

## 139 **2.2 Sample Collection**

140 The fecal and vaginal samples were freshly and simultaneously collected.  
141 Participants collected the fecal samples in a sterile plastic container with a tight  
142 closing lid. To collect the vaginal samples, using a sterile swab stick, clinicians  
143 thoroughly wiped the posterior fornix of the vagina of the participants. These  
144 swabs were stored in sterile vials. Both types of samples were packaged and first  
145 placed in a frozen storage at  $-20^{\circ}\text{C}$  in the hospital and later, within 24 hours,  
146 transported on ice to be stored at  $-80^{\circ}\text{C}$  at Gujarat Biotechnology Research Centre  
147 (GBRC) for further analysis.

148

## 149 **2.3 DNA extraction**

150 DNA extraction was performed from approximately 200 mg of fecal samples and  
151 ~1ml of thoroughly vortexed swab sample using QIAamp DNA Stool Mini Kit  
152 according to the manufacturer's instructions. Total DNA was eluted in 30  $\mu\text{L}$  of  
153 AE buffer. DNA concentration was quantified fluorometrically with a Qubit 2.0  
154 dsDNA HS Assay kit. DNA was stored at  $-20^{\circ}\text{C}$  for further procedures.

155

156

157



## 158 **2.4 Library preparation and 16s rRNA Sequencing**

159 The V2-V3 hypervariable regions of the 16S rRNA gene were amplified using  
160 fusion primers, 101□F5'ACTGGCGGACGGGTGAGTAA 3' and 518□R  
161 5'CGTATTACCGCGGCTGCTGG 3'. Amplicon libraries were purified using the  
162 Agencourt AMPure XP (Beckman Coulter). For quality control, we used  
163 Bioanalyzer with a DNA-HS assay kit. All the libraries were quantified using  
164 Qubit fluorimeter v4.0 and were pooled into equimolar concentrations. Clonal  
165 amplification (Emulsion PCR) sequencing was performed on the Ion S5 system  
166 using the Ion 520/530 kit OT2 (ThermoFisher Scientific) with Ion One Touch 2  
167 system, which uses a 530 chip on Ion S5 plus sequencer according to the  
168 manufacturer's instructions.

## 169 **2.5 Bioinformatics and Statistical analysis**

### 170 **Diversity**

171 Microbial community richness and diversity was evaluated by  $\alpha$ -diversity that  
172 included Chao1 and Shannon indices. The Kruskal–Wallis test used to determine  
173 statistical differences between the three groups. The Mann–Whitney U test was  
174 used to determine the influence of diet on  $\alpha$ -diversity.  $\beta$ -diversity, differences in  
175 microbial community structures between the three groups, was analysed using  
176 Principle Coordinate Analysis (PCoA) based on Bray-Curtis and Jaccard distances,

177 and the statistical difference between the groups was calculated using non-  
178 parametric multivariate analysis of variance (PERMANOVA).

179 QIIME2 software was used to calculate alpha and beta diversity indices. The  
180 demultiplexed sequences were uploaded to QIIME2 environment, and denoising  
181 was carried out using DADA2. Amplicon sequence variants (ASVs) were  
182 predicted at a minimum sampling depth of 25000 for Gut datasets, and 9000 for the  
183 vaginal datasets. The predicted ASVs were taxonomically classified using the pre-  
184 trained classifier of the full 16S rRNA gene sequence of the SILVA database.

### 185 **Taxonomic structure**

186 We analysed the gut microbiota at the community level to determine differences in  
187 the microbial composition between groups and to identify taxa with significantly  
188 different abundance (relative abundance  $> 0.001$  and  $P < 0.05$ ). Additionally, linear  
189 discriminant analysis (LDA) Effect Size (LEfSe) method was employed to identify  
190 species with significant differences in abundance between the three groups ( $|LDA|$   
191  $> 3$  and  $P < 0.05$ ). Kruskal–Wallis and Mann–Whitney U tests were performed  
192 for computing statistical differences between the groups at taxonomic levels in the  
193 study viz., three major groups and the infertile cohort versus controls using  
194 STAMP v2.1 software (Parks et al., 2014).

195 Continuous data are presented as mean  $\pm$  standard deviation (SD) or frequencies  
196 (number and percentages), calculated using GraphPad Prism statistical software  
197 6.0. To determine statistical differences in subjects' characteristics between  
198 groups, we performed one-way ANOVA followed by post-hoc Tukey testing.

### 199 **3. Results**

#### 200 **3.1 Clinical Characteristics among the Control, RIF, and UE Groups**

201 We included 31 study subjects, comprising 11 fertile women, enrolled as the  
202 control group, 10 women with a history of RIF, and 10 women with a history of  
203 UE (**Table 1**). Comparisons of the mean age between the three groups showed that  
204 the controls were statistically significantly younger than the RIF group ( $F=6.8$ ,  $p$   
205  $<0.01$ ), while the UE group was older than the controls and younger than the RIF  
206 group, although both differences were statistically insignificant (**Table 1**). The  
207 average BMI was not significantly different between the controls and the UE group  
208 and between the RIF and UE groups but was significant between the controls and  
209 the RIF group ( $F=3.7$ ,  $p<0.05$ ) (**Table 1**). Among women with RIF, eight were  
210 nullipara (80%), and two were nulligravida (20%), while all women with UE  
211 (100%) were nullipara. There were more vegetarian participants in the UE group (9  
212 of 10; 90%) than in the RIF group (4 of 10; 40%) and the controls (4 of 11; 36%)  
213 (**Table 1**).

214

## 215 **3.2 Metagenomics Findings of Gut and Vaginal bacteria**

216 In total 31 fecal samples and 24 vaginal swab samples, sequencing of the V2-V3  
217 region of the 16S rRNA gene created 235810 sequences, with an average of 1,01,  
218 767 sequences, and 178260 high-quality sequences, with an average of 3,76,012  
219 sequences, per sample for fecal and vaginal samples respectively. Based on the  
220 results of the operational taxonomic units (OTUs) analysis, rarefaction curves  
221 show that the sequencing depth was adequate to analyse the gut and vaginal  
222 bacteria in the three groups (**Figures S1 (a), (b) and Figures S2 (a), (b)**).

223

## 224 **3.3 Richness and diversity of Gut bacteria**

225 We performed bacterial diversity analyses by comparing the richness using Chao 1  
226 and evenness using the Shannon index for the fecal microbial communities  
227 between the three groups. We found that richness differed significantly between  
228 the three groups (Chao 1 index (Kruskal–Wallis test,  $p= 0.049$ )) (**Figure 1(a)**).  
229 Precisely, the controls had a significantly higher richness than the RIF group  
230 ( $p_{\text{Chao 1}} = 0.04$ ) and UE group ( $p_{\text{Chao 1}} = 0.03$ ). Richness was similar between  
231 RIF and UE groups ( $p_{\text{Chao 1}} = 0.75$ ). We discovered that evenness differed  
232 significantly between the three groups: Shannon index (Kruskal–Wallis test,  $p =$   
233  $0.003$ ) (**Figure 1(b)**). Specifically, the controls had more evenness than the RIF  
234 ( $p_{\text{Shannon}} = 0.006$ ) and the UE groups ( $p_{\text{Shannon}} = 0.002$ ). In contrast, evenness

235 was similar between the RIF and the UE groups ( $p_{\text{Shannon}} = 0.65$ ). Interestingly,  
236 the diet did not affect alpha diversity ( $p_{\text{Shannon}} = 0.165$ ) (**Figure 3S**).

237 Regarding the bacterial community structure differences, the PCoA plot of the  
238 Bray-Curtis and Jaccard dissimilarity showed that bacteria of the RIF and UE  
239 groups overlapped and that both groups differed markedly from the controls  
240 (**Figures 2(a), (b)**). In the PCoA plot based on Bray-Curtis distances, the first and  
241 second axes of the PCoA explained 21.5% of the total variance with a significant  
242 difference (PERMANOVA,  $P < 0.05$ ,  $R^2 = 0.12$ ; **Figures 2(a)**). Showing the similar  
243 clustering pattern, in the Jaccard based PCoA plot, the first and second axes  
244 explained 23.4% of the total variance with a significant difference  
245 (PERMANOVA,  $P < 0.05$ ,  $R^2 = 0.10$ ; **Figures 2(b)**).

246

### 247 **3.5 Taxonomic analysis of Gut bacteria**

248 After excluding the sequences that were present in less than 3%, we clustered the  
249 high-quality sequences into OTUs and assigned taxonomic identities.

250 Consequently, we found 550 OTUs pertaining to 481 genera, 265 families, 156  
251 orders, 68 classes, 715 species and 28 phyla. To evaluate the contribution of  
252 different taxa to diversity and composition, we calculated the relative abundance of  
253 taxa at the phylum, family and genus levels. Except at the genus level, we could

254 not find statistically significant alteration of particular taxa at any other levels.  
255 Though, noticeable trends from a clinical point of view were still apparent in the  
256 data.

257 Across all 31 participants, the phyla level composition, represented by read  
258 percentages, showed usual human microbiota structures. Overall, among the  
259 detected 28 phyla, the four most abundant microbes were *Firmicutes* (85.10%),  
260 *Bacteroidetes* (7.70%), *Proteobacteria* (4.75%), and *Actinobacteria* (1.8%)  
261 **(Figure 3(a))**. With a relative abundance of less than 1%, the remaining bacterial  
262 population belonged to four phyla, including *Verrucomicrobia*, *Tenericutes*,  
263 *Cyanobacteria*, and *Chloroflexi*.

264 Firmicutes were abundant (7-9 %) in the RIF group than both the control and UE  
265 groups. *Firmicutes* were only slightly more abundant (2%) in the UE group than  
266 the controls. *Bacteroidetes* were depleted (50% less) in the RIF group than the  
267 other two groups. In contrast, the control and UE groups had the same levels of  
268 *Bacteroidetes*. *Proteobacteria* were relatively less abundant (4-7% less) in the RIF  
269 group than the control and UE groups **(Figure 3 (a))**. Among the three groups, the  
270 UE group had the highest levels of *Proteobacteria*, almost 2 fold higher than the  
271 controls. *Actinobacteria* were depleted in the UE group (~4 fold less) compared to

272 the other two groups, with the RIF group showing the highest abundance amongst  
273 all the groups, with 2 fold more abundance than the control group (**Figure 3(a)**).

274 The dominant bacterial families for all the subjects in the descending order of  
275 abundance were *Lachnospiraceae*, *Ruminococcaceae*, *Bifidobacteriaceae*,  
276 *Erysipelotrichaceae*, *Lactobacillaceae*, *Prevotellaaceae*, *Vellinollacaea* and  
277 *Enterobacteriaceae* (**Figure 3(b)**). The levels of *Lachnospiraceae* and  
278 *Ruminococcaceae* were similar between the three groups. Notably, the levels of  
279 *Lactobacillaceae* and *Prevotellaaceae* families were highest in the controls as  
280 compared to the other two infertile groups. *Bacteroidaceae*, *Vellinollacaea* and  
281 *Enterobacteriaceae* were highest in the UE group compared to the RIF and control  
282 groups, while *Bifidobacteriaceae* and *Erysipelotrichaceae* families were highest in  
283 the RIF group as compared to the control and UE groups (**Figure 3(b)**).

284 We further determined statistical differences in the specific bacterial genera of the  
285 three groups. Among 481 genera, the 6 were statistically significantly ( $p < 0.05$ )  
286 different: *Bacteroides*, *Prevotella 9*, *Hungatella*, *Ruminococcaceae UCG-004*,  
287 *Ruminococcaceae UCG-010*, and *Sutterella*. Aside from *Bacteroides* and  
288 *Prevotella 9*, the abundance of the other 5 genera, while statistically significant  
289 ( $p < 0.05$ ), occurred in much lower proportions (<1%). Notably, *Bacteroides* and

290 *Hungatella* were abundant in the infertile cohort, especially in the UE group, than  
291 the controls (**Figure 3(c)**).

292 *Bacteroides* and *Prevotella 9*, the two most highly abundant genera, varied  
293 significantly between the three groups. Compared to the controls, the relative  
294 abundance of *Prevotella 9* plunged noticeably in the RIF group (7 fold), and the  
295 UE group (8 fold), and the relative abundance of *Bacteroides* rose in the RIF group  
296 (1.5 fold) and UE group (3.2 fold) (**Figure 3(c)**). When we compared the infertile  
297 group against the controls, we found that in the infertile cohort *Prevotella 9*,  
298 *Ruminococcaceae UCG-004*, *Ruminococcaceae UCG-010* ( $p < 0.05$ ) declined,  
299 whereas *Bacteroides*, *Dorea*, *oral clone FR58* and *Peptoniphilus* increased  
300 ( $p < 0.05$ ) (**Figure 4S**).

### 301 **3.7 LEfSe analysis**

302 LEfSe analysis was performed to assess the differentially abundant communities in  
303 the three groups (**Figure 4 (a), (b)**). In the controls, we observed diverse microbial  
304 communities with a high LDA score (Log10), with *Clostridia* showing the highest  
305 LDA score  $> 9$  ( $p < 0.05$ ). In the RIF group, only *Eubacterium halli* showed the  
306 highest dominance with an LDA score  $> 7$  ( $p < 0.05$ ). In the UE group,  
307 unconventional *Firmicutes* such as *Veillonellaceae*, *Selenomonadales*, of the class  
308 *Negativicutes*, showed the highest preponderance with an LDA score  $> 7$  ( $p < 0.05$ ).



### 309 **3.8 Metagenomics of vaginal bacteria**

310 Across the 24 vaginal samples, we found 384 distinct species belonging to 301  
311 different genera classified in 135 different families, distributed into 10 phyla. We  
312 compared taxa between the three groups. Given the small sample size, we could  
313 not detect a significant statistical difference between them. Nonetheless, interesting  
314 trends in the data were apparent from a clinical point of view.

### 315 **3.9 Taxonomic Analysis of Vaginal Bacteria**

316 In the descending order, the dominant phyla, among the 10 detected phyla,  
317 included *Firmicutes*, *Fusobacteria*, *Proteobacteria*, *Actinobacteria*, *Bacteroidetes*,  
318 and *Patescibacteria* (**Figure 5(a)**). Of these, *Firmicutes* accounted for the vast  
319 majority of the vaginal bacteria in all the groups, with both the RIF (69%) and UE  
320 (69.71%) groups showing similar relative abundance, which was higher than the  
321 controls (53%). *Fusobacteria* (18% Vs. 0.07 Vs. 0.14) and *Bacteroidetes* (4.1%  
322 Vs.0.17 Vs. 0.92) were relatively abundant in the controls than the RIF and UE  
323 groups. *Proteobacteria* were marginally more abundant in both RIF (15% Vs.11%)  
324 and UE (19% Vs. 11%) groups compared to the controls (**Figure 5(a)**).

325 The dominant families for all the groups in the descending order of abundance  
326 were *Lactobacillaceae*, *Bifidobacteriaceae*, *Leptotrichiaceae*, and *Prevotellaceae*  
327 (**Figure 5(b)**). *Lactobacillaceae* and *Bifidobacteriaceae* were present in all the

328 groups. Reflecting this trend at the phylum level, levels of *Lactobacillaceae* were  
329 higher in all the groups, with UE (65.3%) and RIF (58.41%) women showing the  
330 highest levels compared with the controls (47.2%).

331 At the genus level, 5 genera were detected, of which three were present in all the  
332 groups (**Figure 5(c)**). *Lactobacillus* was the most dominant genus among them,  
333 followed by *Gardnerella* and *Parvimonas*. *Gardnerella*, *Prevotella*, *Parvimonas*,  
334 and *Sneathia* were relatively more abundant in the controls compared to the  
335 infertile groups. Compared to the controls, *Lactobacillus* was relatively more  
336 abundant in the RIF and the UE groups (2-fold).

337 At the species levels, *Sneathia ammi* (0.36%) was detected only in the control  
338 groups. In contrast, *Lactobacillus iners AB-1* were present in all the groups, with  
339 descending order of relatively high abundance in the following manner: the UE  
340 group (62%), the controls (16%), and the RIF group (11.02%) (**Figure 5(d)**).

### 341 **3.10 LEfSe analysis**

342 We performed LEfSe analysis to assess the differentially abundant vaginal  
343 bacterial communities in the three groups. We could only find significant  
344 differences in the controls, with *Leptotrichia*, of the phylum *Fusobacteria*,  
345 showing an LDA (Log10) score  $>3$  ( $p < 0.05$ ) (**Figure 6**).

### 346 **3.11 Alterations of the genus *Lactobacillus* Species**

347 Within the genus of *Lactobacillus*, 9 species were identified. *L. gasseri*, *L. ruminis*,  
348 and *L. iners AB-1* were found in all the groups, with *Lactobacillus iners AB-1*  
349 being the most abundant species (**Figure 7**). Among these, *L. jensenii* and *L.*  
350 *vaginalis* were only detected in the UE group, while *L.reuteri* was unique to the  
351 RIF group. *L. equicursoris*, *L. fermentum* and *L. salivarius* were unique to the  
352 controls.

#### 353 **4. Discussion**

354 We compared, for the first time, the gut-vaginal microbiota axis of fertile women  
355 with that of women diagnosed with RIF and UE. The core findings include i) the  
356 infertile groups had gut dysbiosis as evident by low  $\alpha$ -diversity indices and beta  
357 diversity metrics; ii) the gut microbial composition of the RIF and UE groups  
358 differed noticeably, with a set of Gram-positive taxa, mainly members of the  
359 phylum *Firmicutes*, being dominant in the former group and a set of Gram-  
360 negative bacteria, comprising members of the phylum *Proteobacteria* and the class  
361 *Negativicutes*, of the phylum *Firmicutes*, being dominant in the latter group; iii)  
362 butyrate-producing genera such as *Prevotella* declined in the infertile cohort; iv)  
363 elevated levels of the genus *Hungatella* occurred in the infertile cohort, especially  
364 in the UE; and v) the infertile cohort, especially the RIF group, had a  
365 comparatively healthy vaginal microbiota than the controls.

366 Gut microbial richness and diversity, defined by  $\alpha$ -diversity indices, declined  
367 amongst the infertile groups, with the highest decline in the UE group. Studies  
368 have suggested that reduced  $\alpha$ -diversity, an important indicator of gut microbiome  
369 health, indicates low-grade inflammatory disorders such as inflammatory bowel  
370 disease, metabolic disorder and obesity (Ott and Schreiber 2006, Le Chatelier,  
371 Nielsen et al. 2013, Al-Assal, Martinez et al. 2018). Of note, diet (vegetarian vs.  
372 Non-vegetarian) had little influence on  $\alpha$ -diversity. Although, a fine-grained  
373 analysis showed vegetarian women had a higher proportion of the phyla  
374 *Patescibacteria* and the genus *Bacteroides*, likely reflecting its role in the digestion  
375 of plant fiber (Matijašić, Obermajer et al. 2014, Jang, Choi et al. 2017). Gut  
376 dysbiosis was also reflected in beta diversity indices, suggesting a distinct bacterial  
377 composition between the infertile cohort and the controls.

378 Notably, the reduction in the richness of gut bacteria in the RIF group was seen for  
379 the phyla *Bacteroidetes* and *Proteobacteria* compared with the other groups.  
380 Mirroring this, we observed a lower percentage of *prevotellaceae* (phylum  
381 *Bacteroidetes*), *Veillonellaceae* (phylum *Proteobacteria*), *Enterobacteriaceae*  
382 (phylum *Proteobacteria*). This was partly reflected at the genus level by a several-  
383 fold decrease in the genus *Prevotella* (phylum *Bacteroidetes*) and a mild elevation  
384 in *Bacteroidaceae* (phylum *Bacteroidetes*). In contrast, in the UE group, the  
385 reduction in richness was seen mainly for the phyla *Actinobacteria* and marginally

386 for *Bacteroidetes*. In keeping with this, reduced levels of the *Bifidobacteriaceae*  
387 family (Phylum *Actinobacteria*) were noted, and a marginal decline in the phyla  
388 *Bacteroidetes* was reflected by the depletion of the *prevotellaceae* family (phylum  
389 *Bacteroidetes*) and a modest rise in *Bacteroidaceae* (phylum *Bacteroidetes*).

390 Altogether, the data clearly indicate that the reduced microbial richness in the RIF  
391 and UE groups is characterised by contrasting types of abundance at the taxa level.  
392 Nonetheless, data showed a partial overlap at the genus level in that a relative  
393 decline in the abundance of *Prevotella* and an increase in the abundance of  
394 *Bacteroides* commonly occurred in both the groups. Since *Prevotella* builds the  
395 protective gut mucosal barrier from short-chain fatty acids (SCFAs) such as  
396 butyrate and *Bacteroides* impedes mucin synthesis by producing metabolites such  
397 as succinate, acetate, and propionate, these findings suggest thinned mucosal  
398 protection is the common abnormality in the infertile cohort. (Mejía-León and  
399 Barca 2015). Of note, although not highly abundant in the infertile cohort,  
400 *Ruminococcaceae* UCG-004 and *Ruminococcaceae* UCG-010, of the  
401 *Ruminococcaceae* family and the genus *Sutterella* declined as well. These are also  
402 butyrate- producing genera (Vital, Karch et al. 2017, Jennings, Koch et al. 2019,  
403 Wang, Wichienhot et al. 2019).

404 When the mucus barrier is thinned, the gut bacteria and other microbe-associated  
405 molecular patterns (MAMPs) come in direct contact with toll-like receptors

406 (TLRs), located in the gut epithelial cells such as the Paneth cells (Uchida,  
407 Oyanagi et al. 2014, Okumura and Takeda 2017, Steimle, Michaelis et al. 2019).  
408 TLRs recognise microbes and MAMPs, and subsequently elicit an immune  
409 response, leading to localised and systemic inflammation, which can cause  
410 implantation failure (Uchida, Oyanagi et al. 2014, Mejía-León and Barca 2015,  
411 Okumura and Takeda 2017, Steimle, Michaelis et al. 2019).

412 We proffer the following hypotheses to explain how the gut dysbiosis in the  
413 infertile groups causes implantation failure by separate mechanisms that promote  
414 systemic inflammation. We posit that gut dysbiosis–induced metabolic  
415 dysregulation plays a role in RIF. At the phyla level, abundances of *Bacteroidetes*  
416 and *Proteobacteria* were lower. By contrast, *Firmicutes* and *Actinobacteria*'s  
417 levels were higher in the RIF group compared with the other two groups--  
418 indicating an obesity-associated microbiota profile (Koliada, Syzenko et al. 2017).  
419 Obesity has been linked to an increase in *Firmicutes* to *Bacteroidetes* (F/B) ratio  
420 (Verdam, Fuentes et al. 2013, Koliada, Syzenko et al. 2017).

421 Conversely, weight loss has been shown to normalise this ratio (Koliada, Syzenko  
422 et al. 2017). The F/B ratio was elevated in six out of ten women in the RIF group.  
423 In contrast, only two to three subjects had elevated F/B ratio in the other groups.  
424 Unsurprisingly, the RIF group's mean BMI, highest among the three groups, was  
425 in the obesity range (obesity  $\geq 25$  kg/m<sup>2</sup> for Asian Indians (Mahajan and Batra

426 2018)), which chimes with the fact that obesity is a risk factor for RIF(Zhang, Liu  
427 et al. 2019).

428 Notably, the Clostridium XIVa cluster, of the *Firmicutes* phylum, whose members  
429 comprise flagellated bacteria with a tendency to colonise mucus, play a critical role  
430 in metabolic dysregulation such as obesity (including visceral  
431 adiposity) (Lopetuso, Scaldaferri et al. 2013, Verdam, Fuentes et al. 2013,  
432 Jennings, Koch et al. 2019). Indeed, a trend towards an increase in the relative  
433 abundance of *Firmicutes* genera in this cluster such as *Lachnoclostridium*, *Dorea*,  
434 *Ruminococcus 2*, and *Eubacterium* was duly noted in the RIF group (Lopetuso,  
435 Scaldaferri et al. 2013). Crucially, LEfSe analysis found that *Eubacteriumhalli*, a  
436 member of this cluster, previously found to be elevated in human obesity, is a RIF  
437 biomarker (Sanz, Santacruz et al. 2008, Verdam, Fuentes et al. 2013). Strikingly,  
438 the RIF group had the highest levels of the *Erysipelotrichaceae* (phylum  
439 *Firmicutes*) family. In contrast, it was almost absent in the two groups. Elevated  
440 levels of *Erysipelotrichaceae* has been linked to human obesity and has been  
441 correlated to elevated levels of Tumor Necrosis Factor-alpha (TNF- $\alpha$ ), a pro-  
442 inflammatory cytokine involved in obesity-linked insulin resistance (Kaakoush  
443 2015). Tellingly, a high relative abundance of *Firmicutes* has been shown to  
444 correlate with increased levels of peripheral TNF- $\alpha$  (Orbe-Orihuela, Lagunas-  
445 MartÃ-nez et al. 2018). A rodent study found that a high-fat diet first increased the

446 phylum *Firmicutes*, corresponding with the changes of Paneth cell-antimicrobial  
447 peptides, which was later followed by the elevations of circulating inflammatory  
448 cytokines, including TNF- $\alpha$ , thus establishing causality between the phylum  
449 *Firmicutes* and TNF- $\alpha$  (Guo, Li et al. 2017).

450 Therefore, precisely, we postulate that the phylum *Firmicutes* generates TNF- $\alpha$ -  
451 driven systemic inflammation, and consequent insulin resistance may cause RIF.  
452 Strikingly, investigators showed elevated TNF- $\alpha$ /IL-10 ratio correlates with an  
453 increased risk of IVF failure (Winger, Reed et al. 2011). Chan *et al.* found that  
454 insulin resistance reduces implantation rate in *in vitro* maturation-*in vitro*  
455 fertilization-embryo transfer cycle (Chang, Han et al. 2013). Metformin, known to  
456 reduce the F/B ratio, has been shown to increase pregnancy rate in IVF repeaters  
457 without polycystic ovary syndrome (Jinno, Watanabe et al. 2010, Wang, Saha et al.  
458 2018). Investigator showed an arginine-rich diet, known to reduce obesity and  
459 increase insulin sensitivity, corrects the elevated F/B ratio and increases embryo  
460 survival (Dai, Wu et al. 2011).

461 The most striking phyla level changed in the UE group involved depletion of  
462 *Actinobacteria* and abundance of *Proteobacteria*, the pro-inflammatory phylum,  
463 comprising common pathogens (e.g., *Escherichia*, *Salmonella*) (Sekirov, Russell et  
464 al. 2010). Compared to the controls, only marginal changes occurred in the levels  
465 of phyla *Firmicutes* and *Bacteroidetes* in this group, suggesting a critical role of



466 *Proteobacteria* phyla in UE. This concurs with the fact that *Bifidobacterium*, a  
467 genus of the depleted phyla *Actinobacteria*, inhibits gut pathogens (Azad, Sarker et  
468 al. 2018). Unsurprisingly, compared to the other two groups, the UE group had the  
469 highest enrichment of pathogenic Gram-negative families, whose outer membrane  
470 contains a unique component, lipopolysaccharide (LPS) (Brown 2019). These  
471 bacterial families included: *Bacteroidaceae* (phylum *Bacteroidetes*),  
472 *Veillonellaceae* (phylum *Firmicutes*) and *Enterobacteriaceae* (phylum  
473 *Bacteroidetes*). Cogently, LEfSe analysis revealed members of the *Negativicutes*  
474 class—such as *Veillonellaceae*, *Selenomonadales*, which are atypical gram-  
475 negative *Firmicutes*, which possess lipopolysaccharides in the outer membranes—  
476 were biomarkers of UE (Vesth, Ozen et al. 2013).

477 The abundance of *Negativicutes* has been linked with an increase in the systemic  
478 levels of IL-6, the pro-inflammatory cytokine (Leite, Rodrigues et al. 2017). Along  
479 this line, enrichment of other Gram-negative species has been shown to increase  
480 plasma IL-6 levels (de Man, van Kooten et al. 1989, Leite, Rodrigues et al. 2017,  
481 Higuchi, Rodrigues et al. 2018). LPS of Gram-negative species, a pro-  
482 inflammatory endotoxin, binds to TLR-4 in the gastrointestinal mucosa, triggering  
483 an inflammatory cascade that causes localised NF- $\kappa$ B activation, ensuing the  
484 systemic secretion of IL-6 (Steimle, Michaelis et al. 2019).

485 Taken together, we proffer that in the setting of the enfeebled mucosal barrier, the  
486 overload of Gram-negative bacteria activates the gut innate immune system,  
487 generating IL-6-driven systemic low-grade inflammation, ultimately leading to  
488 UE. Indeed, Demir *et al.* found higher serum IL-6 levels, but not TNF-alpha levels,  
489 in women with UE than fertile women (Demir, Guven et al. 2009). Since elevated  
490 IL-6 levels impair various aspects of reproductive physiology, including LH  
491 secretion, LH-induced ovulation, and FSH-stimulated E2 and progesterone release,  
492 the gut bacteria-induced higher IL-6 levels may thus cause UE through these  
493 mechanisms (Demir, Guven et al. 2009).

494 In the infertile cohort, fascinatingly, elevated levels of *Hungatella*, producers of  
495 trimethylamine N-oxide (TMAO), which enhances thrombotic potential through  
496 platelet hyperreactivity, were found than the controls (Zhu, Gregory et al. 2016,  
497 Genoni, Christophersen et al. 2019). This data raises the possibility that an  
498 overactive coagulation system is a common mechanism of implantation failure.  
499 Since levels of *Hungatella* were highest in the UE group, this indicates an  
500 important role of thrombosis in UE. Indeed, Azem *et al.* found inherited  
501 thrombophilia plays a role in repeated IVF failures, particularly in the subgroup  
502 with UE (Azem, Maslovich et al. 2001).

503 Regarding the landscape of the vaginal microbiota, data showed that the vaginal  
504 bacterial community was less diverse than in the gut. Rarefaction analysis found

505 that the RIF group had the lowest microbial diversity of the three groups,  
506 suggesting a healthy vaginal microbiota in the RIF group (Lokken, Richardson et  
507 al. 2019). We posit that through TNF- $\alpha$ -driven systemic insulin resistance, gut  
508 dysbiosis in the RIF group causes hyperglycemia and consequently increases  
509 glycogen levels in the vaginal epithelium, which is required for the maintenance of  
510 healthy microbiota (Carrara, Bazotte et al. 2009, Amabebe and Anumba 2018).  
511 Alternatively, adipose tissue-driven rise in peripheral estrogen may increase the  
512 glycogen content of vaginal epithelial cells (Lokken, Richardson et al. 2019). This  
513 chimes with the finding that obesity protects against vaginal dysbiosis (Lokken,  
514 Richardson et al. 2019). By contrast, the highest microbial diversity in the control  
515 group suggests vaginal dysbiosis. LEfSe analysis found *Leptotrichia*, an  
516 opportunistic pathogen of the female urogenital tract of the phylum *Fusobacteria*,  
517 in this group (Thiesen, Nicolaidis et al. 2007). In line with this, other pathogenic  
518 genera such as *Gardnerella*, *Prevotella*, and *Snaethia* were relatively more  
519 abundant in the controls compared to the infertile groups (Thiesen, Nicolaidis et  
520 al. 2007, Amabebe and Anumba 2018).

521 Consistent with previous research, *Firmicutes*, mainly *Lactobacilli* spp.,  
522 constituted the bulk of total bacteria of all the groups (Madhivanan, Raphael et al.  
523 2014, Madhivanan, Alleyn et al. 2015). Of the nine detected *Lactobacilli* spp., four  
524 belonged to the *L. delbrueckii*, subsp. of the *L. acidophilus* group (*L. iners*,

525 *L.gasseri*, *L. jensenii*, *L. equicursoris*), three belonged to the *L. reuteri* group (*L.*  
526 *fermentum*, *L. reuteri*, *L. vaginalis*), and two belonged to the *L. salivarius* group  
527 (*L.ruminis*, *L. salivarius*) (Salvetti, Torriani et al. 2012). Of the three groups, the *L.*  
528 *reuteri* group comprises mostly obligate heterofermentative lactobacilli, consistent  
529 with the finding that compared to the women in the USA, Indian women housed a  
530 higher proportion of obligate heterofermentative lactobacilli, reflecting a need for  
531 metabolic plasticity and an adaptation against high pathogen load (Salvetti,  
532 Torriani et al. 2012, Madhivanan, Raphael et al. 2014, Madhivanan, Alleyn et al.  
533 2015). Three *Lactobacillus* species dominated the vaginal microbiota across the  
534 groups: *L. iners*, *L.gasseri*, and *L.ruminis*, with *L. iners* being the most abundant,  
535 suggesting the existence of community state type 3 (CST 3) of the five human  
536 vaginal microbial communities (HVMC) as classified by Ravel et al. (2011)  
537 (Ravel, Gajer et al. 2011). To put this in context, *L. crispatus*, *L. jensenii*, *L.*  
538 *gasseri*, and *L. iners* occur most frequently in the healthy vagina worldwide,  
539 although substantial geographic, socio-economic and ethnic variations exist  
540 (Madhivanan, Krupp et al. 2008, Madhivanan, Raphael et al. 2014).

541 By lowering the vaginal PH<4 through lactic acid, generating bacteriocins and  
542 hydrogen peroxide (H<sub>2</sub>O<sub>2</sub>), or acting as a competitive inhibitor, *Lactobacilli* spp.  
543 protect the vagina from opportunistic pathogens (Kalia, Singh et al. 2020, Wang,  
544 Fan et al. 2020). Notably, though this protection varies according to strains based

545 on their ability to produce D-lactic acid, which keeps PH<4, and antibacterial  
546 compounds (Wang, Fan et al. 2020). Most studies have shown that *L. iners*,  
547 lacking the ability to produce D-lactic acid, is less protective than other strains  
548 such as *L. crispatus* and *L. salivarius* (Pino, Bartolo et al. 2019, Kalia, Singh et al.  
549 2020, Wang, Fan et al. 2020). Indeed, the highest relative proportions of  
550 *Lactobacillus iners AB-1* occurred in the UE group, suggesting a weakened  
551 resistance to colonisation by pathogens (Wang, Fan et al. 2020).

552 In sum, we illuminated gut and vaginal bacterial communities' landscape, both at  
553 broader and finer levels, in implantation failure-associated infertile women and  
554 fertile women and offer conjectures to explain the data. Most importantly, these  
555 findings suggest that gut dysbiosis does not necessarily lead to vaginal dysbiosis.  
556 We hope that this study has laid the foundation of research on the link between the  
557 gut microbiota, the gut-reproductive microbiota axis, and implantation failure,  
558 which can lead microbiota-based diagnostic tools and therapeutic strategies.

559 Our study has a few limitations. First, since it is an underpowered single-center  
560 study, multi-center longitudinal studies with a large sample size are needed.  
561 Second, although we suggested the mechanistic hypotheses, we did not measure  
562 alterations in the immune system, hormones, platelet parameters and bacterial  
563 metabolic products such as short-chain fatty acids. Third, owing to the limited  
564 resolution of the 16S rRNA-sequencing technique, we could not identify what

565 specific bacterial species or strains were involved. Fourth, we have not controlled  
566 for the factors that influence the vaginal microbiota such as menses, vaginal  
567 douching, and contraception. Fifth, we included two women with RPL in the RIF  
568 group. Finally, the functional significance of many species such as *peptoniphilus*  
569 remains undetermined in our analysis as the literature is scant on these genera.  
570 Hence, future investigations should address these shortcomings.

571

## 572 **References**

- 573 Al-Assal, K., A. C. Martinez, R. S. Torrinhas, C. Cardinelli and D. Waitzberg (2018). "Gut  
574 microbiota and obesity." *Clinical Nutrition Experimental* **20**: 60-64.
- 575 Al-Nasiry, S., E. Ambrosino, M. Schlaepfer, S. A. Morré, L. Wieten, J. W. Voncken, M.  
576 Spinelli, M. Mueller and B. W. Kramer (2020). "The Interplay Between Reproductive Tract  
577 Microbiota and Immunological System in Human Reproduction." *Frontiers in immunology* **11**:  
578 378-378.
- 579 Alexander, K. L., S. R. Targan and C. O. Elson, 3rd (2014). "Microbiota activation and  
580 regulation of innate and adaptive immunity." *Immunological reviews* **260**(1): 206-220.
- 581 Amabebe, E. and D. O. C. Anumba (2018). "The Vaginal Microenvironment: The Physiologic  
582 Role of Lactobacilli." *Frontiers in medicine* **5**: 181-181.
- 583 Azad, M. A. K., M. Sarker, T. Li and J. Yin (2018). "Probiotic Species in the Modulation of Gut  
584 Microbiota: An Overview." *BioMed research international* **2018**: 9478630-9478630.
- 585 Azem, F., S. Maslovich, A. Amit, J. B. Lessing, M. J. Kupferminc and A. Many (2001).  
586 "Increased rates of thrombophilia in women with repeated in-vitro fertilization-embryo transfer  
587 (IVF-ET) failures." *Fertility and Sterility* **76**(3): S226.
- 588 Baker, J. M., L. Al-Nakkash and M. M. Herbst-Kralovetz (2017). "Estrogen–gut microbiome  
589 axis: Physiological and clinical implications." *Maturitas* **103**: 45-53.
- 590 Bellver, J., S. R. Soares, C. Alvarez, E. Munoz, A. Ramirez, C. Rubio, V. Serra, J. Remohi and  
591 A. Pellicer (2008). "The role of thrombophilia and thyroid autoimmunity in unexplained  
592 infertility, implantation failure and recurrent spontaneous abortion." *Hum Reprod* **23**(2): 278-  
593 284.
- 594 Brown, G. C. (2019). "The endotoxin hypothesis of neurodegeneration." *Journal of*  
595 *Neuroinflammation* **16**(1): 180.
- 596 Budden, K. F., S. L. Gellatly, D. L. A. Wood, M. A. Cooper, M. Morrison, P. Hugenholtz and P.  
597 M. Hansbro (2017). "Emerging pathogenic links between microbiota and the gut–lung axis."  
598 *Nature Reviews Microbiology* **15**(1): 55-63.
- 599 Carrara, M. A., R. B. Bazotte, L. Donatti, T. I. Svidzinski, M. E. Consolaro, E. V. Patussi and M.  
600 R. Batista (2009). "Effect of experimental diabetes on the development and maintenance of  
601 vulvovaginal candidiasis in female rats." *Am J Obstet Gynecol* **200**(6): 659 e651-654.
- 602 Chang, E. M., J. E. Han, H. H. Seok, D. R. Lee, T. K. Yoon and W. S. Lee (2013). "Insulin  
603 resistance does not affect early embryo development but lowers implantation rate in in vitro  
604 maturation–in vitro fertilization–embryo transfer cycle." *Clinical Endocrinology* **79**(1): 93-99.
- 605 Cho, S. H., J. H. Kim, H. J. An, J. O. Kim, Y. R. Kim, W. S. Lee and N. K. Kim (2019).  
606 "Association of methionine synthase (rs1805087), methionine synthase reductase (rs1801394),  
607 and methylenetetrahydrofolate dehydrogenase 1 (rs2236225) genetic polymorphisms with  
608 recurrent implantation failure." *Hum Fertil (Camb)*: 1-8.
- 609 Christiansen, O. B., H. S. Nielsen, A. Kolte and A. T. Pedersen (2006). "Research methodology  
610 and epidemiology of relevance in recurrent pregnancy loss." *Semin Reprod Med* **24**(1): 5-16.
- 611 Christiansen, O. B., H. S. Nielsen and A. M. Kolte (2006). "Future directions of failed  
612 implantation and recurrent miscarriage research." *Reprod Biomed Online* **13**(1): 71-83.
- 613 Dai, Z.-L., G. Wu and W.-Y. Zhu (2011). "Amino acid metabolism in intestinal bacteria: links  
614 between gut ecology and host health." *Frontiers in bioscience (Landmark edition)* **16**: 1768-  
615 1786.

616 de Man, P., C. van Kooten, L. Aarden, I. Engberg, H. Linder and C. Svanborg Edén (1989).  
617 "Interleukin-6 induced at mucosal surfaces by gram-negative bacterial infection." *Infection and*  
618 *immunity* **57**(11): 3383-3388.

619 Demir, B., S. Guven, E. S. G. Guven, Y. Atamer and T. Gul (2009). "Serum IL-6 level may have  
620 role in the pathophysiology of unexplained infertility." *American journal of reproductive*  
621 *immunology* (New York, N.Y. : 1989) **62**(4): 261-267.

622 El Hachem, H., V. Crepaux, P. May-Panloup, P. Descamps, G. Legendre and P.-E. Bouet (2017).  
623 "Recurrent pregnancy loss: current perspectives." *International journal of women's health* **9**: 331-  
624 345.

625 Genoni, A., C. T. Christophersen, J. Lo, M. Coghlan, M. C. Boyce, A. R. Bird, P. Lyons-Wall  
626 and A. Devine (2019). "Long-term Paleolithic diet is associated with lower resistant starch  
627 intake, different gut microbiota composition and increased serum TMAO concentrations."  
628 *European Journal of Nutrition*.

629 Graham, R. A., M. W. Seif, J. D. Aplin, T. C. Li, I. D. Cooke, A. W. Rogers and P. Dockery  
630 (1990). "An endometrial factor in unexplained infertility." *BMJ (Clinical research ed.)*  
631 **300**(6737): 1428-1431.

632 Guo, X., J. Li, R. Tang, G. Zhang, H. Zeng, R. J. Wood and Z. Liu (2017). "High Fat Diet Alters  
633 Gut Microbiota and the Expression of Paneth Cell-Antimicrobial Peptides Preceding Changes of  
634 Circulating Inflammatory Cytokines." *Mediators of inflammation* **2017**: 9474896-9474896.

635 Hernández-Vargas, P., M. Muñoz and F. Domínguez (2020). "Identifying biomarkers for  
636 predicting successful embryo implantation: applying single to multi-OMICs to improve  
637 reproductive outcomes." *Human Reproduction Update* **26**(2): 264-301.

638 Higuchi, B. S., N. Rodrigues, M. I. Gonzaga, J. C. C. Paiolo, N. Stefanutto, W. P. Omori, D. G.  
639 Pinheiro, J. L. Brisotti, E. Matheucci, Jr., V. S. Mariano and G. L. V. de Oliveira (2018).  
640 "Intestinal Dysbiosis in Autoimmune Diabetes Is Correlated With Poor Glycemic Control and  
641 Increased Interleukin-6: A Pilot Study." *Frontiers in immunology* **9**: 1689-1689.

642 Jang, H. B., M.-K. Choi, J. H. Kang, S. I. Park and H.-J. Lee (2017). "Association of dietary  
643 patterns with the fecal microbiota in Korean adolescents." *BMC Nutrition* **3**(1): 20.

644 Jennings, A., M. Koch, M. K. Jensen, C. Bang, J. Kassubek, H.-P. Müller, U. Nöthlings, A.  
645 Franke, W. Lieb and A. Cassidy (2019). "The role of the gut microbiome in the association  
646 between habitual anthocyanin intake and visceral abdominal fat in population-level analysis."  
647 *The American Journal of Clinical Nutrition* **111**(2): 340-350.

648 Jinno, M., A. Watanabe, N. Eguchi, N. Hatakeyama, J. Hirohama and E. Hiura (2010). "Low-  
649 dose metformin improves pregnancy rate in IVF repeaters without polycystic ovary syndrome:  
650 its indication and mechanism." *Fertility and Sterility* **94**(4): S29.

651 Kaakoush, N. O. (2015). "Insights into the Role of Erysipelotrichaceae in the Human Host."  
652 *Frontiers in cellular and infection microbiology* **5**: 84-84.

653 Kalia, N., J. Singh and M. Kaur (2020). "Microbiota in vaginal health and pathogenesis of  
654 recurrent vulvovaginal infections: a critical review." *Annals of Clinical Microbiology and*  
655 *Antimicrobials* **19**(1): 5.

656 Kamel, R. M. (2010). "Management of the infertile couple: an evidence-based protocol."  
657 *Reproductive biology and endocrinology : RB&E* **8**: 21-21.

658 Koliada, A., G. Syzenko, V. Moseiko, L. Budovska, K. Puchkov, V. Perederiy, Y. Gavalko, A.  
659 Dorofeyev, M. Romanenko, S. Tkach, L. Sineok, O. Lushchak and A. Vaiserman (2017).  
660 "Association between body mass index and Firmicutes/Bacteroidetes ratio in an adult Ukrainian  
661 population." *BMC microbiology* **17**(1): 120-120.



662 Le Chatelier, E., T. Nielsen, J. Qin, E. Prifti, F. Hildebrand, G. Falony, M. Almeida, M.  
663 Arumugam, J.-M. Batto, S. Kennedy, P. Leonard, J. Li, K. Burgdorf, N. Grarup, T. Jørgensen, I.  
664 Brandslund, H. B. Nielsen, A. S. Juncker, M. Bertalan, F. Levenez, N. Pons, S. Rasmussen, S.  
665 Sunagawa, J. Tap, S. Tims, E. G. Zoetendal, S. Brunak, K. Clément, J. Doré, M. Kleerebezem,  
666 K. Kristiansen, P. Renault, T. Sicheritz-Ponten, W. M. de Vos, J.-D. Zucker, J. Raes, T. Hansen,  
667 H. I. T. c. Meta, P. Bork, J. Wang, S. D. Ehrlich and O. Pedersen (2013). "Richness of human  
668 gut microbiome correlates with metabolic markers." *Nature* **500**(7464): 541-546.  
669 Leite, A. Z., N. d. C. Rodrigues, M. I. Gonzaga, J. C. C. Paiolo, C. A. de Souza, N. A. V.  
670 Stefanutto, W. P. Omori, D. G. Pinheiro, J. L. Brisotti, E. Matheucci Junior, V. S. Mariano and  
671 G. L. V. de Oliveira (2017). "Detection of Increased Plasma Interleukin-6 Levels and Prevalence  
672 of *Prevotella copri* and *Bacteroides vulgatus* in the Feces of Type 2 Diabetes Patients." *Frontiers*  
673 *in immunology* **8**: 1107-1107.  
674 Lindsay, T. J. and K. R. Vitrikas (2015). "Evaluation and treatment of infertility." *American*  
675 *family physician* **91**(5): 308-314.  
676 Lokken, E. M., B. A. Richardson, J. Kinuthia, K. Mwinyikai, A. Abdalla, W. Jaoko, K.  
677 Mandaliya, J. Shafi and R. Scott McClelland (2019). "A Prospective Cohort Study of the  
678 Association Between Body Mass Index and Incident Bacterial Vaginosis." *Sexually transmitted*  
679 *diseases* **46**(1): 31-36.  
680 Lopetuso, L. R., F. Scaldaferri, V. Petito and A. Gasbarrini (2013). "Commensal Clostridia:  
681 leading players in the maintenance of gut homeostasis." *Gut pathogens* **5**(1): 23-23.  
682 Madhivanan, P., H. N. Alleyn, E. Raphael, K. Krupp, K. Ravi, R. Nebhrajani, A. Arun, A. L.  
683 Reingold, L. W. Riley and J. D. Klausner (2015). "Identification of culturable vaginal  
684 *Lactobacillus* species among reproductive age women in Mysore, India." *J Med Microbiol* **64**(6):  
685 636-641.  
686 Madhivanan, P., K. Krupp, V. Chandrasekaran, C. Karat, A. Arun, C. R. Cohen, A. L. Reingold  
687 and J. D. Klausner (2008). "Prevalence and correlates of bacterial vaginosis among young  
688 women of reproductive age in Mysore, India." *Indian J Med Microbiol* **26**(2): 132-137.  
689 Madhivanan, P., E. Raphael, A. Rumphs, K. Krupp, K. Ravi, V. Srinivas, A. Arun, A. L.  
690 Reingold, J. D. Klausner and L. W. Riley (2014). "Characterization of culturable vaginal  
691 *Lactobacillus* species among women with and without bacterial vaginosis from the United States  
692 and India: a cross-sectional study." *Journal of medical microbiology* **63**(Pt 7): 931-935.  
693 Mahajan, K. and A. Batra (2018). "Obesity in adult asian indians- the ideal BMI cut-off." *Indian*  
694 *heart journal* **70**(1): 195-195.  
695 Matijašić, B. B., T. Obermajer, L. Lipoglavšek, I. Grabnar, G. Avguštin and I. Rogelj (2014).  
696 "Association of dietary type with fecal microbiota in vegetarians and omnivores in Slovenia."  
697 *European Journal of Nutrition* **53**(4): 1051-1064.  
698 Mejía-León, M. E. and A. M. C. d. I. Barca (2015). "Diet, Microbiota and Immune System in  
699 Type 1 Diabetes Development and Evolution." *Nutrients* **7**(11): 9171-9184.  
700 Moreno, I., F. M. Codoñer, F. Vilella, D. Valbuena, J. F. Martinez-Blanch, J. Jimenez-Almazán,  
701 R. Alonso, P. Alamá, J. Remohí, A. Pellicer, D. Ramon and C. Simon (2016). "Evidence that the  
702 endometrial microbiota has an effect on implantation success or failure." *Am J Obstet Gynecol*  
703 **215**(6): 684-703.  
704 Okumura, R. and K. Takeda (2017). "Roles of intestinal epithelial cells in the maintenance of gut  
705 homeostasis." *Experimental & Molecular Medicine* **49**(5): e338-e338.  
706 Orbe-Orihuela, Y. C., A. Lagunas-Martínez, M. Bahena-Román, V. Madrid-Marina, K.  
707 Torres-Poveda, E. Flores-Alfaro, A. Mández-Padrón, C. E. Díaz-Benitez, O. Peralta-

- 708 Zaragoza, D. Ant nez-Ortiz, M. Cruz and A. I. Burguete-Garc a (2018). "High relative  
709 abundance of firmicutes and increased TNF- $\pm$  levels correlate with obesity in children." *Salud*  
710 *Publica Mex.* 2018; 60(1): 5-11.
- 711 Ott, S. J. and S. Schreiber (2006). "Reduced microbial diversity in inflammatory bowel diseases."  
712 *Gut* **55**(8): 1207-1207.
- 713 Pino, A., E. Bartolo, C. Caggia, A. Cianci and C. L. Randazzo (2019). "Detection of vaginal  
714 lactobacilli as probiotic candidates." *Scientific Reports* **9**(1): 3355.
- 715 Polanski, L. T., M. N. Baumgarten, S. Quenby, J. Brosens, B. K. Campbell and N. J. Raine-  
716 Fenning (2014). "What exactly do we mean by 'recurrent implantation failure'? A systematic  
717 review and opinion." *Reproductive BioMedicine Online* **28**(4): 409-423.
- 718 Ravel, J. and R. M. Brotman (2016). "Translating the vaginal microbiome: gaps and challenges."  
719 *Genome medicine* **8**(1): 35-35.
- 720 Ravel, J., P. Gajer, Z. Abdo, G. M. Schneider, S. S. K. Koenig, S. L. McCulle, S. Karlebach, R.  
721 Gorle, J. Russell, C. O. Tacket, R. M. Brotman, C. C. Davis, K. Ault, L. Peralta and L. J. Forney  
722 (2011). "Vaginal microbiome of reproductive-age women." *Proceedings of the National*  
723 *Academy of Sciences of the United States of America* **108 Suppl 1**(Suppl 1): 4680-4687.
- 724 Salvetti, E., S. Torriani and G. E. Felis (2012). "The Genus *Lactobacillus*: A Taxonomic  
725 Update." *Probiotics Antimicrob Proteins* **4**(4): 217-226.
- 726 Sanz, Y., A. Santacruz and G. De Palma (2008). "Insights into the roles of gut microbes in  
727 obesity." *Interdisciplinary perspectives on infectious diseases* **2008**: 829101-829101.
- 728 Sekirov, I., S. L. Russell, L. C. M. Antunes and B. B. Finlay (2010). "Gut Microbiota in Health  
729 and Disease." *Physiological Reviews* **90**(3): 859-904.
- 730 Simon, A. and N. Laufer (2012). "Assessment and treatment of repeated implantation failure  
731 (RIF)." *Journal of assisted reproduction and genetics* **29**(11): 1227-1239.
- 732 Steimle, A., L. Michaelis, F. Di Lorenzo, T. Kliem, T. M nznner, J. K. Maerz, A. Sch fer, A.  
733 Lange, R. Parusel, K. Gronbach, K. Fuchs, A. Silipo, H. H.  z, B. J. Pichler, I. B. Autenrieth, A.  
734 Molinaro and J.-S. Frick (2019). "Weak Agonistic LPS Restores Intestinal Immune  
735 Homeostasis." *Molecular therapy : the journal of the American Society of Gene Therapy* **27**(11):  
736 1974-1991.
- 737 Tersigni, C., S. D'Ippolito, F. Di Nicuolo, R. Marana, V. Valenza, V. Masciullo, F. Scaldaferrri,  
738 F. Malatucca, C. de Waure, A. Gasbarrini, G. Scambia and N. Di Simone (2018). "Recurrent  
739 pregnancy loss is associated to leaky gut: a novel pathogenic model of endometrium  
740 inflammation?" *Journal of translational medicine* **16**(1): 102-102.
- 741 Thilesen, C. M., M. Nicolaidis, J. E. L keb , E. Falsen, A. T. Jorde and F. M ller (2007).  
742 "*Leptotrichia amnionii*, an emerging pathogen of the female urogenital tract." *Journal of clinical*  
743 *microbiology* **45**(7): 2344-2347.
- 744 Uchida, M., E. Oyanagi, N. Kawanishi, M. Iemitsu, M. Miyachi, M. J. Kremenik, S. Onodera  
745 and H. Yano (2014). "Exhaustive exercise increases the TNF- $\alpha$  production in response to  
746 flagellin via the upregulation of toll-like receptor 5 in the large intestine in mice." *Immunology*  
747 *letters* **158**(1-2): 151-158.
- 748 Verdam, F. J., S. Fuentes, C. de Jonge, E. G. Zoetendal, R. Erbil, J. W. Greve, W. A. Buurman,  
749 W. M. de Vos and S. S. Rensen (2013). "Human intestinal microbiota composition is associated  
750 with local and systemic inflammation in obesity." *Obesity* **21**(12): E607-E615.
- 751 Vesth, T., A. Ozen, S. C. Andersen, R. S. Kaas, O. Lukjancenko, J. Bohlin, I. Nookaew, T. M.  
752 Wassenaar and D. W. Ussery (2013). "*Veillonella*, Firmicutes: Microbes disguised as Gram  
753 negatives." *Standards in genomic sciences* **9**(2): 431-448.

- 754 Vinchi, F. (2019). "Thrombosis Prevention: Let's Drug the Microbiome!" *HemaSphere* **3**(1):  
755 e165-e165.
- 756 Vital, M., A. Karch and D. H. Pieper (2017). "Colonic Butyrate-Producing Communities in  
757 Humans: an Overview Using Omics Data." *mSystems* **2**(6): e00130-00117.
- 758 Wang, C., A. Fan, H. Li, Y. Yan, W. Qi, Y. Wang, C. Han and F. Xue (2020). "Vaginal bacterial  
759 profiles of aerobic vaginitis: a case-control study." *Diagnostic Microbiology and Infectious  
760 Disease* **96**(4): 114981.
- 761 Wang, M., S. Wichienchot, X. He, X. Fu, Q. Huang and B. Zhang (2019). "In vitro colonic  
762 fermentation of dietary fibers: Fermentation rate, short-chain fatty acid production and changes  
763 in microbiota." *Trends in Food Science & Technology* **88**: 1-9.
- 764 Wang, Z., S. Saha, S. Van Horn, E. Thomas, C. Traini, G. Sathe, D. K. Rajpal and J. R. Brown  
765 (2018). "Gut microbiome differences between metformin- and liraglutide-treated T2DM  
766 subjects." *Endocrinol Diabetes Metab* **1**(1): e00009.
- 767 Winger, E. E., J. L. Reed, S. Ashoush, T. El-Toukhy, S. Ahuja and M. Taranissi (2011). "Degree  
768 of TNF- $\alpha$ /IL-10 Cytokine Elevation Correlates With IVF Success Rates in Women Undergoing  
769 Treatment With Adalimumab (Humira) and IVIG." *American Journal of Reproductive  
770 Immunology* **65**(6): 610-618.
- 771 Witkin, S. S., K. M. Sultan, G. S. Neal, J. Jeremias, J. A. Grifo and Z. Rosenwaks (1994).  
772 "Unsuspected Chlamydia trachomatis infection and in vitro fertilization outcome." *American  
773 Journal of Obstetrics and Gynecology* **171**(5): 1208-1214.
- 774 Zhang, J., H. Liu, X. Mao, Q. Chen, Y. Fan, Y. Xiao, Y. Wang and Y. Kuang (2019). "Effect of  
775 body mass index on pregnancy outcomes in a freeze-all policy: an analysis of 22,043 first  
776 autologous frozen-thawed embryo transfer cycles in China." *BMC Medicine* **17**(1): 114.
- 777 Zhu, W., J. C. Gregory, E. Org, J. A. Buffa, N. Gupta, Z. Wang, L. Li, X. Fu, Y. Wu, M.  
778 Mehrabian, R. B. Sartor, T. M. McIntyre, R. L. Silverstein, W. H. W. Tang, J. A. DiDonato, J.  
779 M. Brown, A. J. Lusis and S. L. Hazen (2016). "Gut Microbial Metabolite TMAO Enhances  
780 Platelet Hyperreactivity and Thrombosis Risk." *Cell* **165**(1): 111-124.

781

782

783 **Acknowledgements:** The authors wish to acknowledge the technical support of  
784 Nitin Savaliya, of Gujarat Biotechnology Research Centre (GBRC), for fecal and  
785 vaginal samples sequencing run. We are also grateful to Dr Yuvraj Jadeja, Dr Nipa  
786 Shah, Dr Nikita Daswani, Hansa Khrishti and Harmi Thakkar for supporting the  
787 clinical work.

788

789 **Authors' contributions:** BP conceptualized the idea, contributed to the design,  
790 made a few suggestions on the statistical methods, interpreted the data, and wrote  
791 the manuscript except for the metagenomics part of the method section. NP  
792 contributed to the design, patient identification, sample collection, ethical approval,  
793 financially supported the clinical work, presented a part of the work, and critically  
794 discussed and corrected the manuscript's clinical aspects. NP collected fecal and  
795 vaginal samples, performed DNA isolation, sequencing, assisted in the analysis,  
796 drafted a part of the material and method section, and prepared some graphs and  
797 tables. SP collected fecal and vaginal samples, performed DNA isolation, library  
798 preparation of samples, and contributed to the correction of materials and method  
799 section. NN analysed the metagenomics data and contributed to the writing of the  
800 metagenomics section of the manuscript. RP sequenced fecal samples and  
801 corrected material and method section. CJ, the director of GBRC, provided  
802 financial and technical support and guidance for metagenomics sequencing and  
803 critically discussed the data. NP and MP contributed to ethical permission, patient  
804 selection and clinical data acquisition and critically discussed the data. All the  
805 authors provided criticisms and read and approved the manuscript.

806

807

808 **Competing interests:** The authors declare no competing interests.

## 809 **Figure and Table Legend**

810

811 **Table 1.** Study characteristics of the control, RIF, and the UE groups. Data are  
812 expressed as the mean  $\pm$  SD or n/N (%).RIF, recurrent implantation failure; UE,  
813 unexplained infertility; BMI, body–mass index; Veg, Vegetarian; NA, Not  
814 applicable. Differences between the 3 groups were assessed by 1-factor ANOVA  
815 and Tukey’s multiple comparison test was used for post-hoc comparisons, if  
816  $P < 0.05$ . In the RIF group, two participants belonged to the RPL category. a.  
817 statistically significant difference between CON and RIF.

818

819 **Figure 1.** Box plots of  $\alpha$ -diversity indices of the gut bacterial microbiomes of the  
820 control (CON, N = 11), RIF (RIF, N = 10), and the UE (UE, N=10) groups: (a)  
821 Shannon and (b) Chao 1 indices. The  $P$  values were determined by the Kruskal-  
822 Wallis test.

823

824 **Figure 2.** Differences in community composition ( $\beta$ -diversity) between the control  
825 (CON, Red, N = 11), RIF (RIF, Green, N = 10), and the UE group (UE, Cyan  
826 N=10) groups. Comparisons are based on the PCoA plots of Bray-Curtis (left) and  
827 Jaccard distances (right). Each principal coordinate axis represents the proportion  
828 of variance. Non-parametric multivariate analysis of variance (PERMANOVA)

829 was used to calculate statistical differences between the groups. In the Bray-Curtis-  
830 based PCoA, the first and second axes of the PCoA accounted for 21.5% of the  
831 total variance (PERMANOVA,  $P < 0.05$ ,  $R^2 = 0.12$ ). In the Jaccard based PCoA, the  
832 first and second axes explained 23.4% of the total variance (PERMANOVA,  
833  $P < 0.05$ ,  $R^2 = 0.10$ ).

834

835 **Figure 3.** The bar chart shows the comparisons of relative abundances of top gut  
836 bacterial taxa between control (CON, N = 11), RIF (RIF, N = 10), and the UE (UE,  
837 N=10) groups at (a) the phylum (b) family and (c) genus levels. No differences in  
838 relative abundance were found between the phylum and family levels ( $P > 0.05$ ,  
839 Kruskal-Wallis test). Six bacterial genera showed statistically significantly  
840 ( $P < 0.05$ , Kruskal-wallis test) differential abundance across the three groups are  
841 shown.

842

843 **Figure 4.** Distinct taxa of the gut bacteria determined by linear discriminant  
844 analysis effect size (LEfSe) analysis in the control (CON, N = 11), RIF (RIF, N =  
845 10), and the UE (UE, N=10) groups. (a) The cladogram shows the taxa that were  
846 significantly elevated between the groups (b) Taxa with an LDA score significant  
847 threshold  $> 3$  are shown ( $P < .05$ ; LDA score  $> 3$ ).

848

849 **Figure 5.** The bar charts show taxonomic comparisons of the vaginal bacteria  
850 between the control (CON, N = 8), RIF (RIF, N = 8), and the UE (UE, N=8)  
851 groups at (a) the phylum, (b) family (c) genus level (d) species levels. No  
852 differences in relative abundance were found at any levels ( $P > 0.05$ , Kruskal-  
853 Wallis test).

854  
855 **Figure 6.** Differentially abundant vagina bacteria between the control (CON, N =  
856 8), RIF (RIF, N = 8), and the UE (UE, N=8) groups as determined by linear  
857 discriminant analysis effect size (LEfSe) analysis. (a) Cladogram shows the taxa  
858 that were significantly enriched between the groups (b) Taxa with a LDA score  
859 significant threshold  $>3$  are shown ( $P < .05$ ; LDA score 3).

860  
861 **Figure 7.** The bar charts show taxonomic comparisons of different *Lactobacillus*  
862 spp. of the vagina between the control (CON, N = 8), RIF (RIF, N = 8), and the UE  
863 (UE, N=8) groups. No significant differences in relative abundance were found  
864 between at any levels ( $P > 0.05$ , Kruskal-Wallis test).

865

866



## 867 **Supplementary figures**

868 **Figure 1S.** Rarefaction analysis of Gut and Vaginal Microbial diversity of the  
869 controls, RIF and UE groups. (A) Rarefaction curve of  $\alpha$ -diversity of the gut  
870 bacteria in control (CON, N = 11), RIF (RIF, N = 10), and the UE (UE, N=10)  
871 groups (B) Rarefaction curve of  $\alpha$ -diversity of the vaginal bacteria in control  
872 (CON, N = 8), RIF (RIF, N = 8), and the UE (UE, N=8) groups. The x-axis shows  
873 the number of sequences per sample, and the y-axis shows the rarefaction measure.  
874 When the curve plateaus, it shows that the sequencing data volume is sufficient to  
875 reveal most of the microbial information in the sample. The values of the y-axis  
876 reflect the community diversity of microbiota. The sequence number in the chart  
877 shows the sequence number of the sample. OTU, operational taxonomic unit.

878  
879 **Figure 2S.** Rarefaction analysis of microbiome diversity sequences per sample: (a)  
880 gut (n=31) and (b) vaginal samples (n=24) (Operational taxonomic units (OTUs)  
881 for each sample at 97% of similarity). Each graph represents mean (column) and  
882 SD (bars).

883  
884 **Figure 3S.** Influence of diet on  $\alpha$ -diversity between vegetarian (n=21) and non-  
885 vegetarian participants (n=10). No significant difference in  $\alpha$ -diversity between  
886 these groups was found ( $P > 0.05$ , the Mann-Whitney U test).

887 **Figure 4S.** The bar chart shows taxonomic comparisons of the gut bacteria  
888 between the controls (CON, N=11) and the infertile cohort (the RIF plus UE  
889 groups, N=20) at the genus level with statistical significance values ( $P > 0.05$ ,  
890 Mann-Whitney U test).

891

892

893

**Table 1**

| Characteristics             | Control<br>(n=11) |            | RIF<br>(n=10)          |            | UE<br>(n=10) |            |
|-----------------------------|-------------------|------------|------------------------|------------|--------------|------------|
| Age<br>(Years)              | 27.9±3.8          |            | 34.5±4.8 <sup>a</sup>  |            | 30.8±3.42    |            |
| BMI<br>(kg/m <sup>2</sup> ) | 21.62±4.05        |            | 25.9±3.31 <sup>a</sup> |            | 23.92±3      |            |
| Nulligravida                | NA                |            | 2 (20%)                |            | NA           |            |
| Nullipara                   |                   |            | 8 (80%)                |            | 10 (100%)    |            |
| Dietary Information         | Veg               | Non-Veg    | Veg                    | Non-Veg    | Veg          | Non-Veg    |
|                             | 5<br>(45%)        | 6<br>(54%) | 4<br>(40%)             | 6<br>(60%) | 9<br>(90%)   | 1<br>(10%) |

Figure 1(a)

Kruskal-Wallis ,  $P=0.049$ ;  $H =6.00$

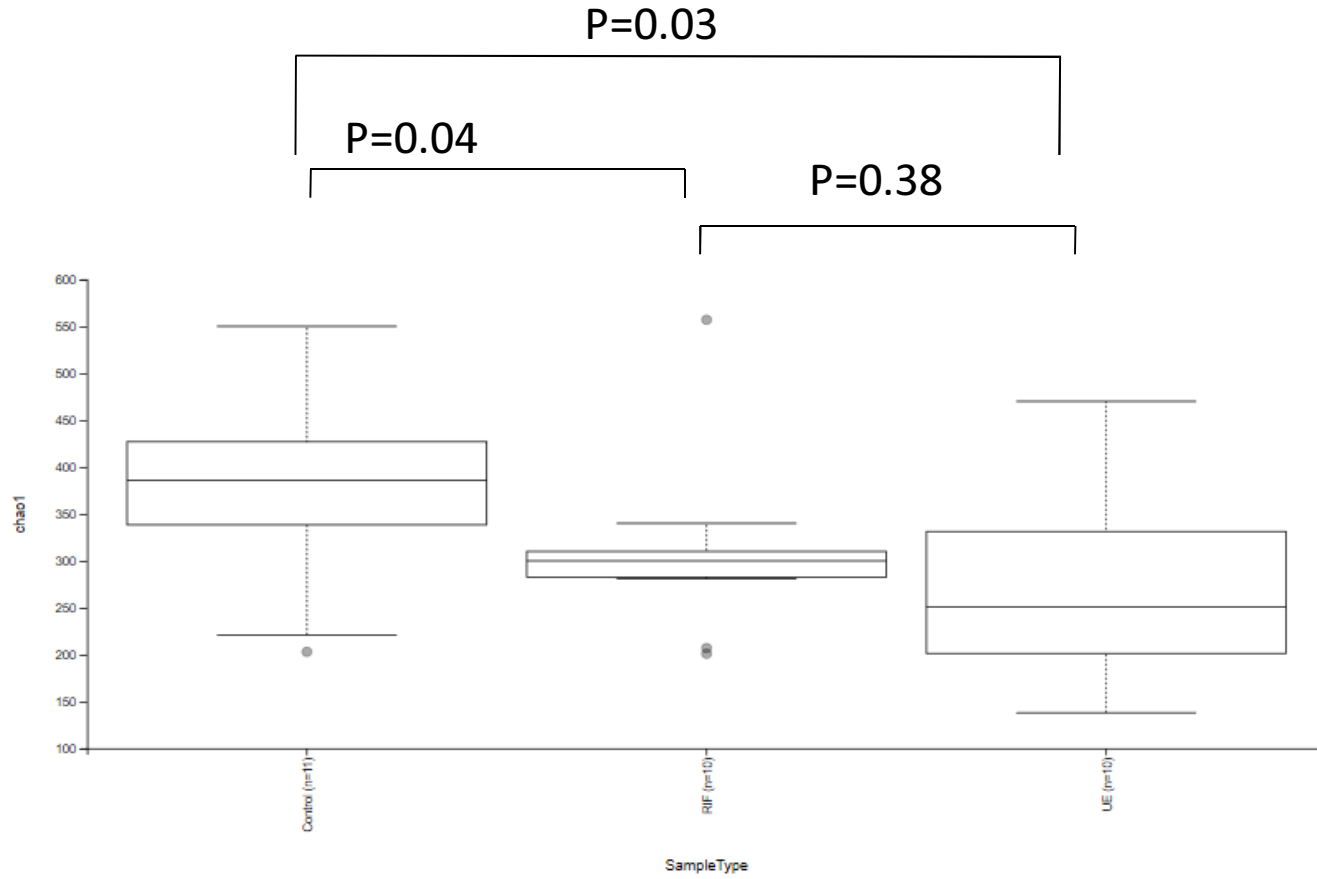

Figure 1(b)

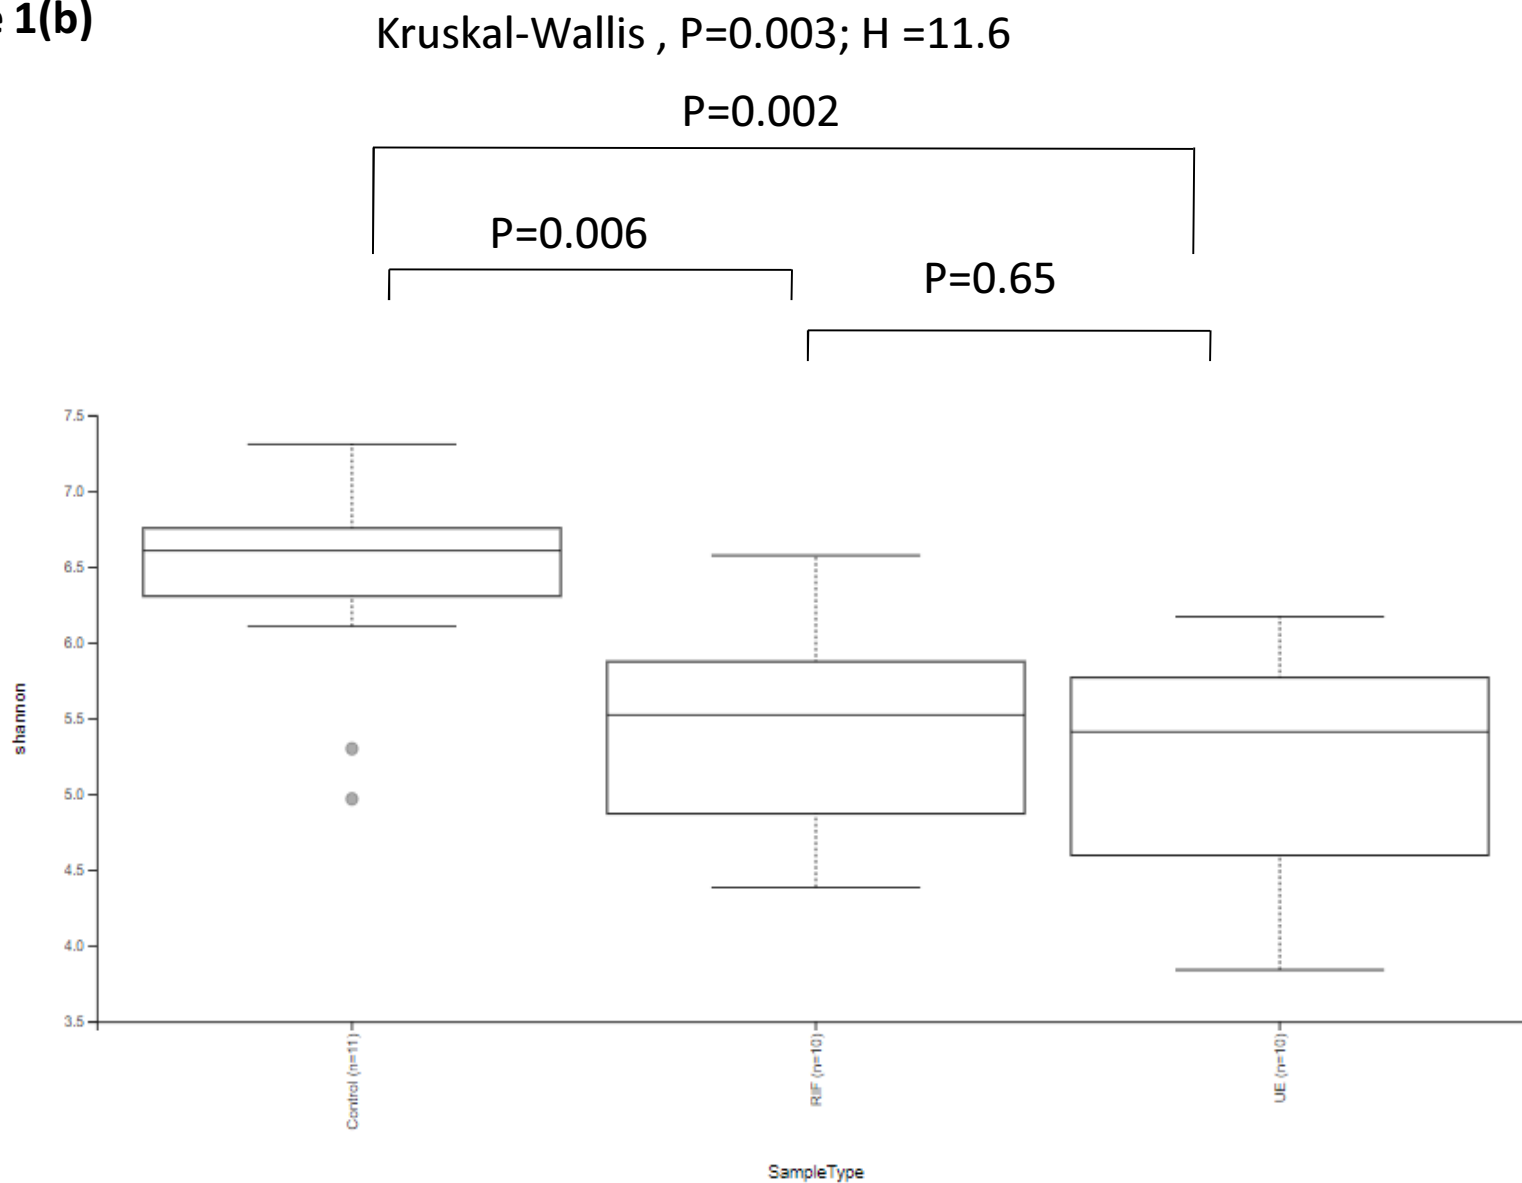

Figure 2(a),(b)

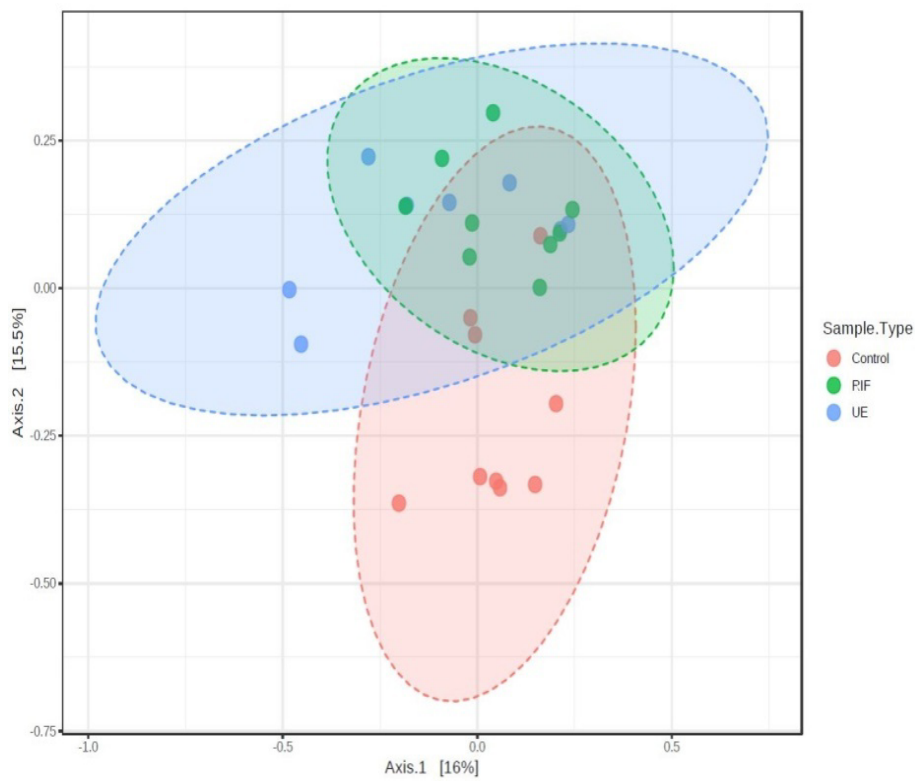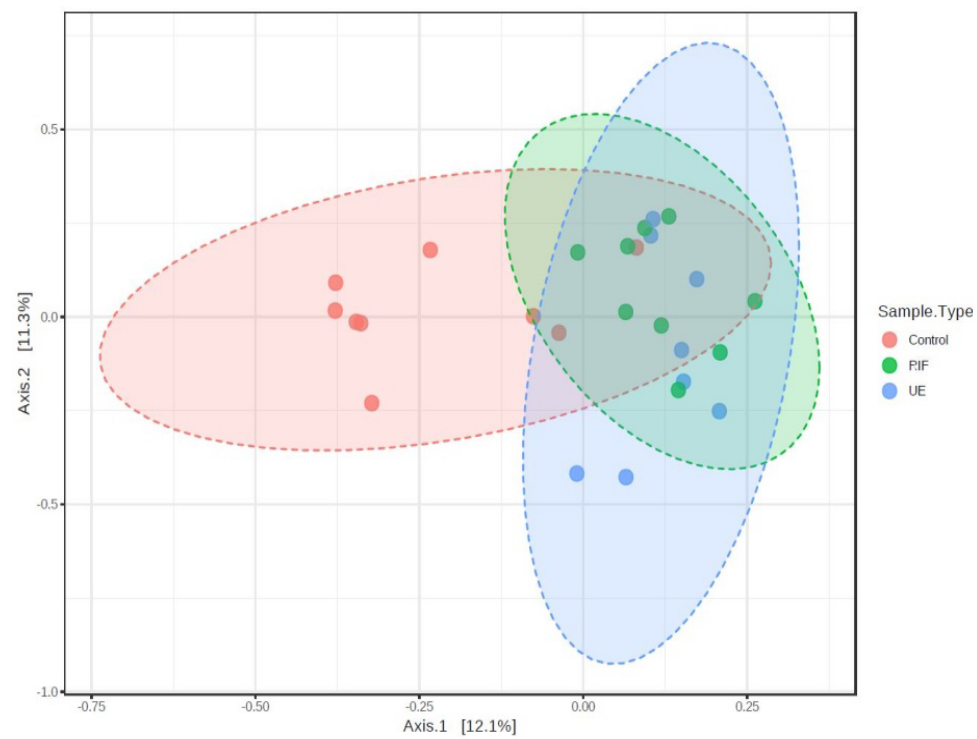

Figure 3(a)

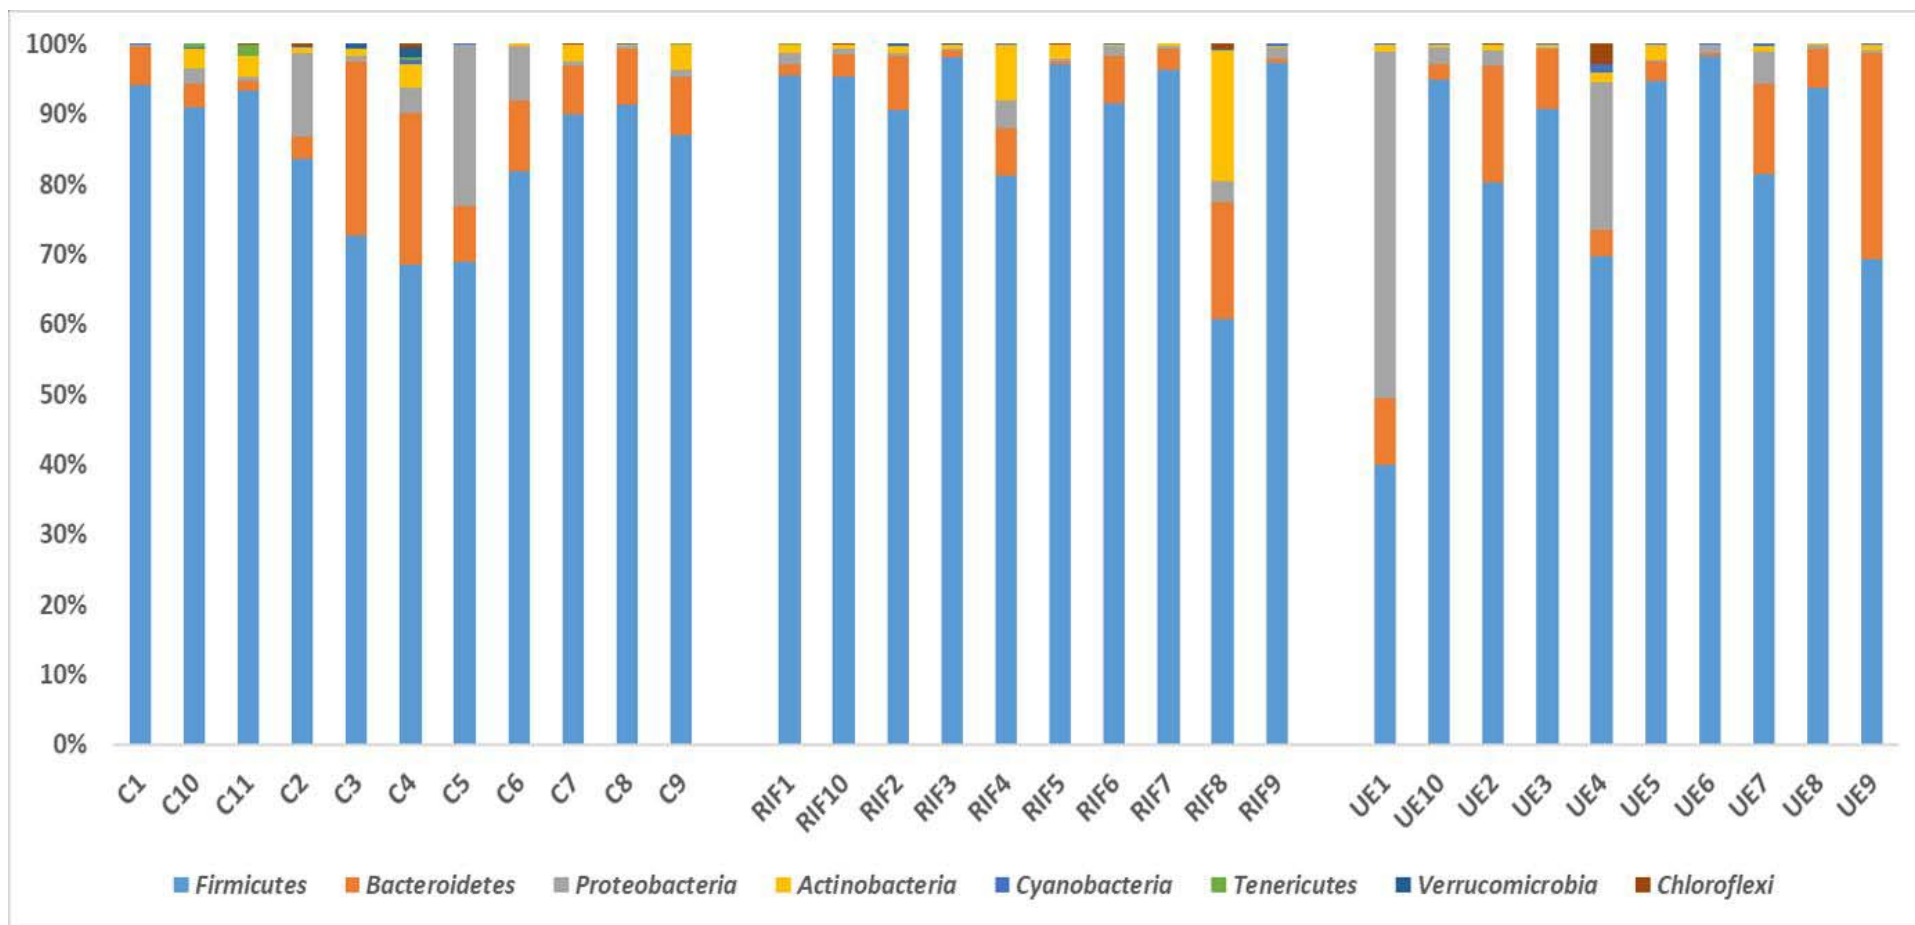

Figure 3(b)

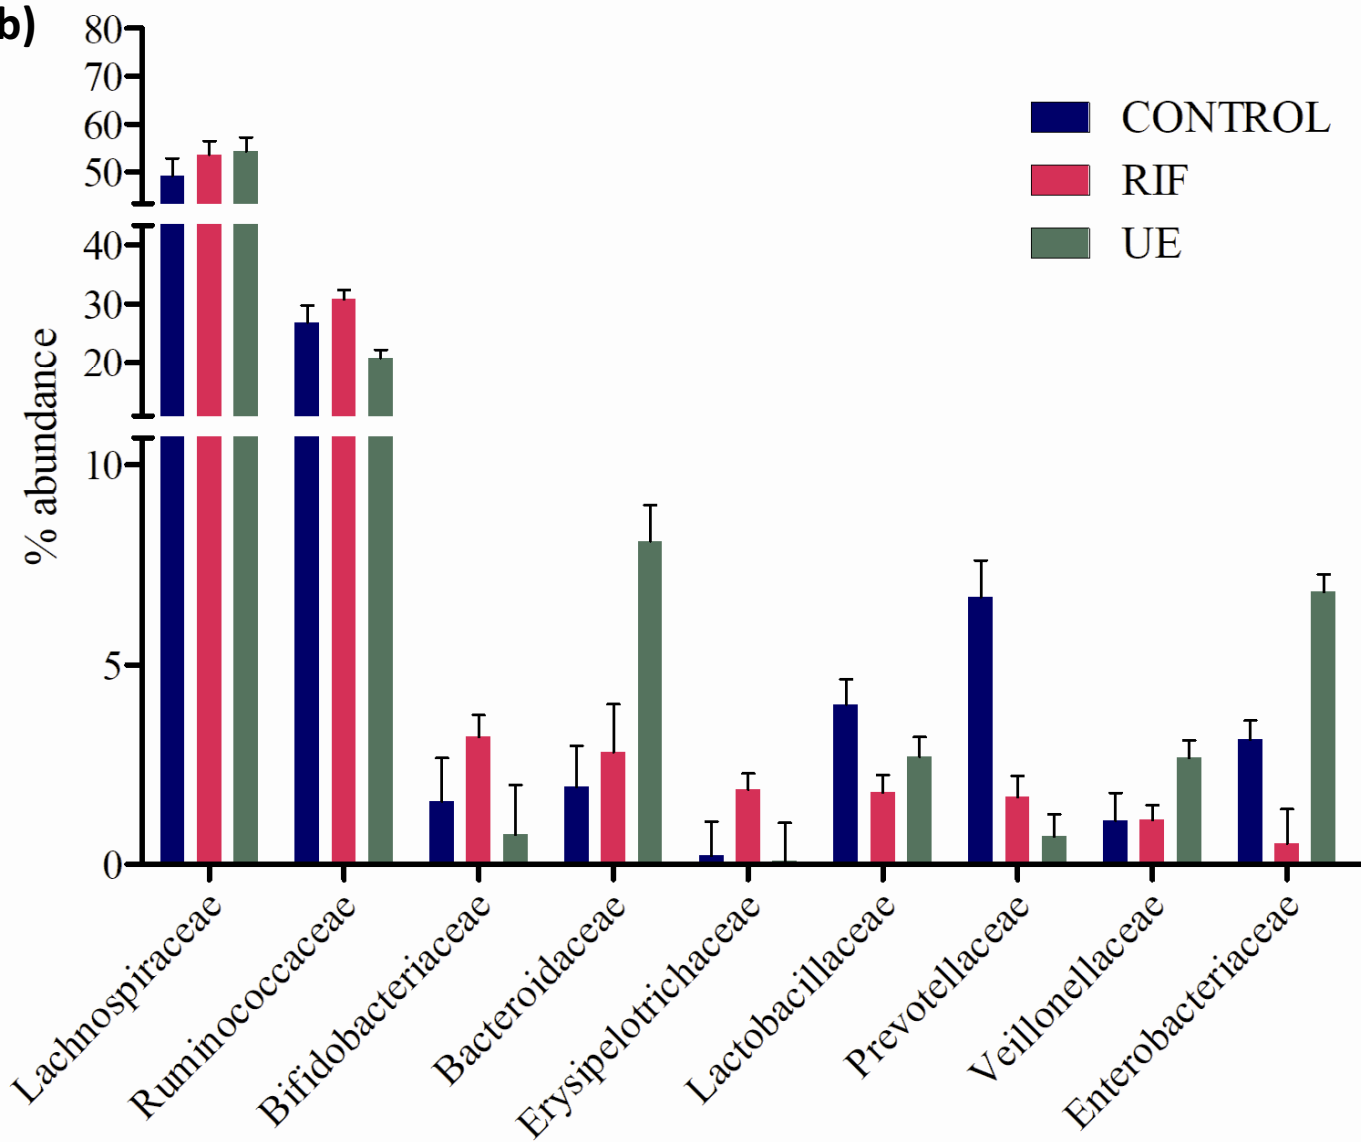



**Figure 3(c)**

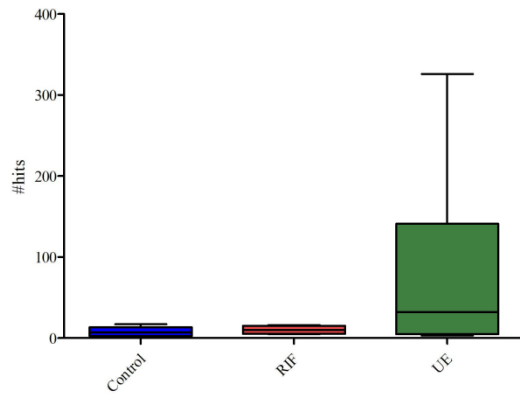

**Hungatella**

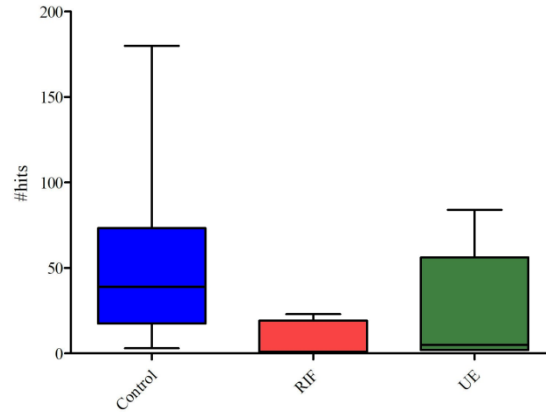

**Ruminococcaceae UCG-010**

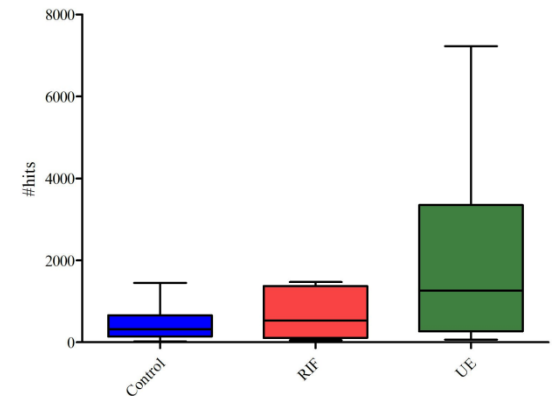

**Bacteroides**

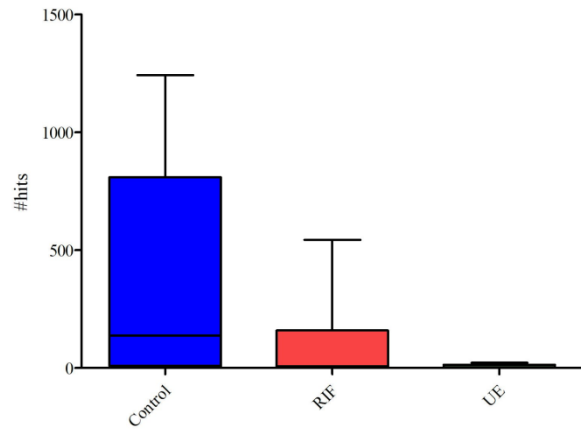

**Prevotella\_9**

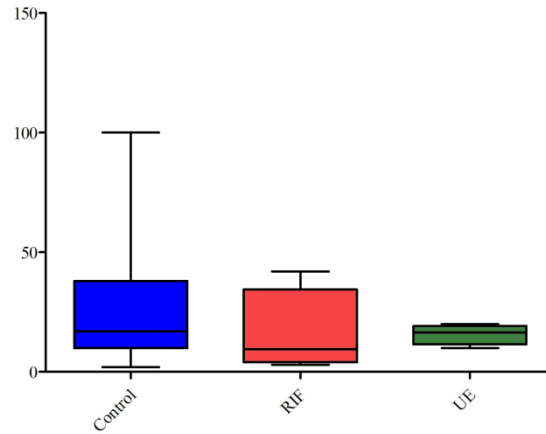

**Ruminococcaceae UCG-004**

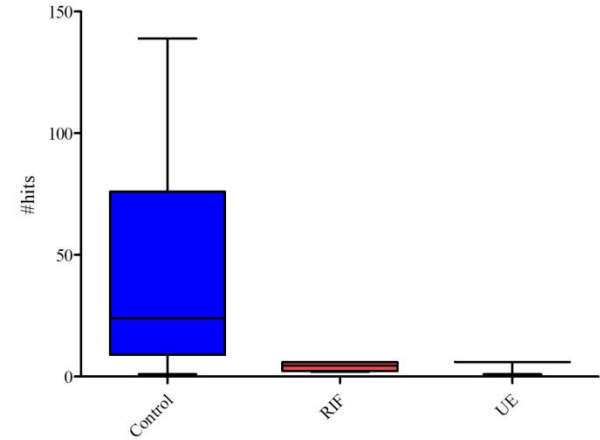

**Sutterella**

Figure 4(a)

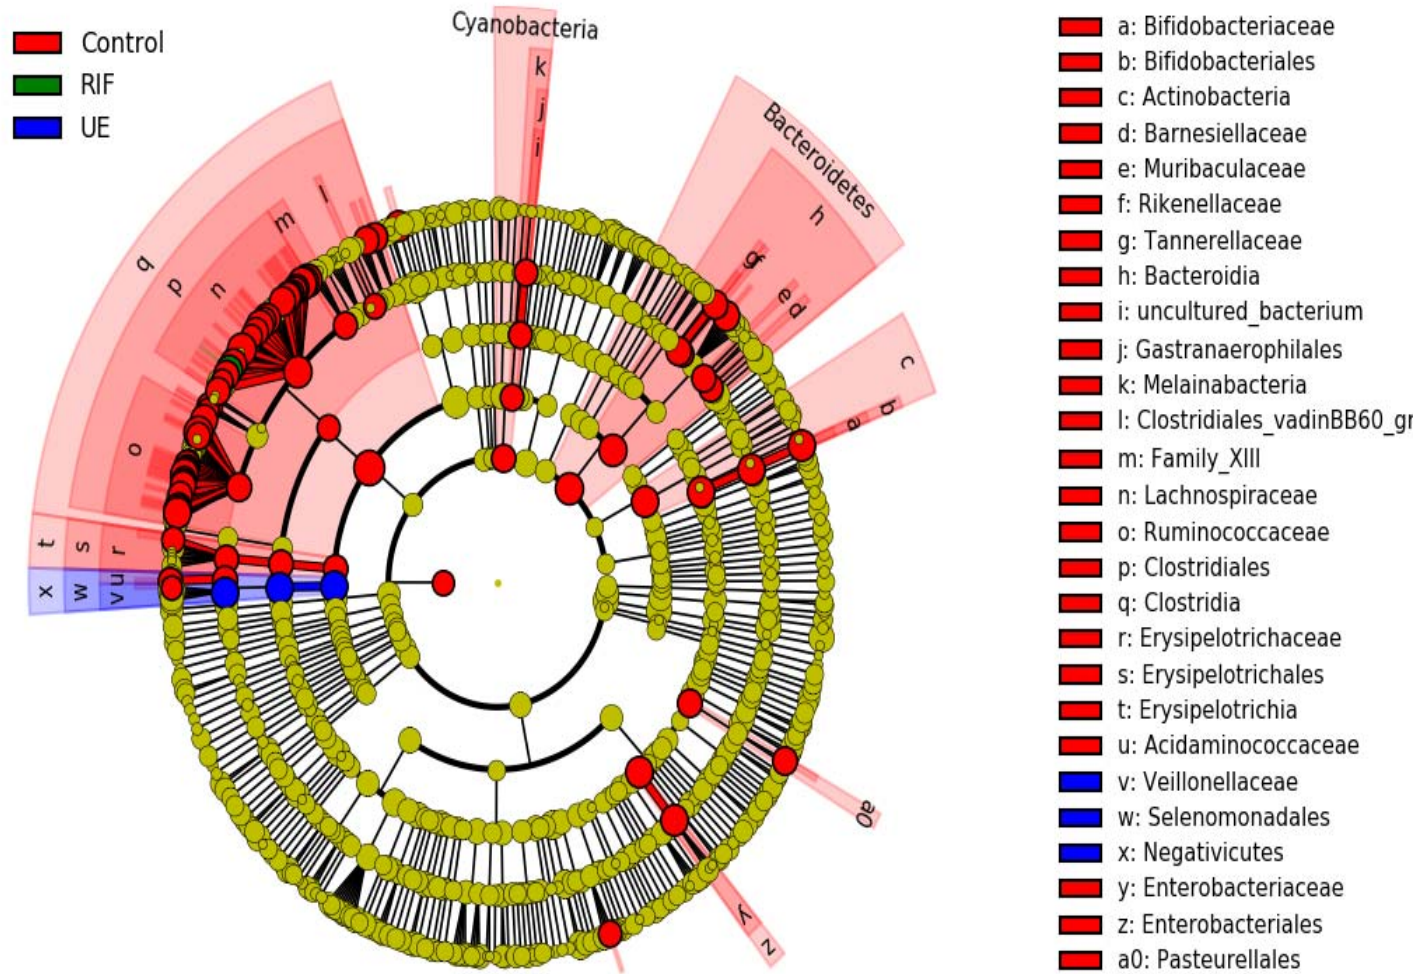

Figure 4(b)

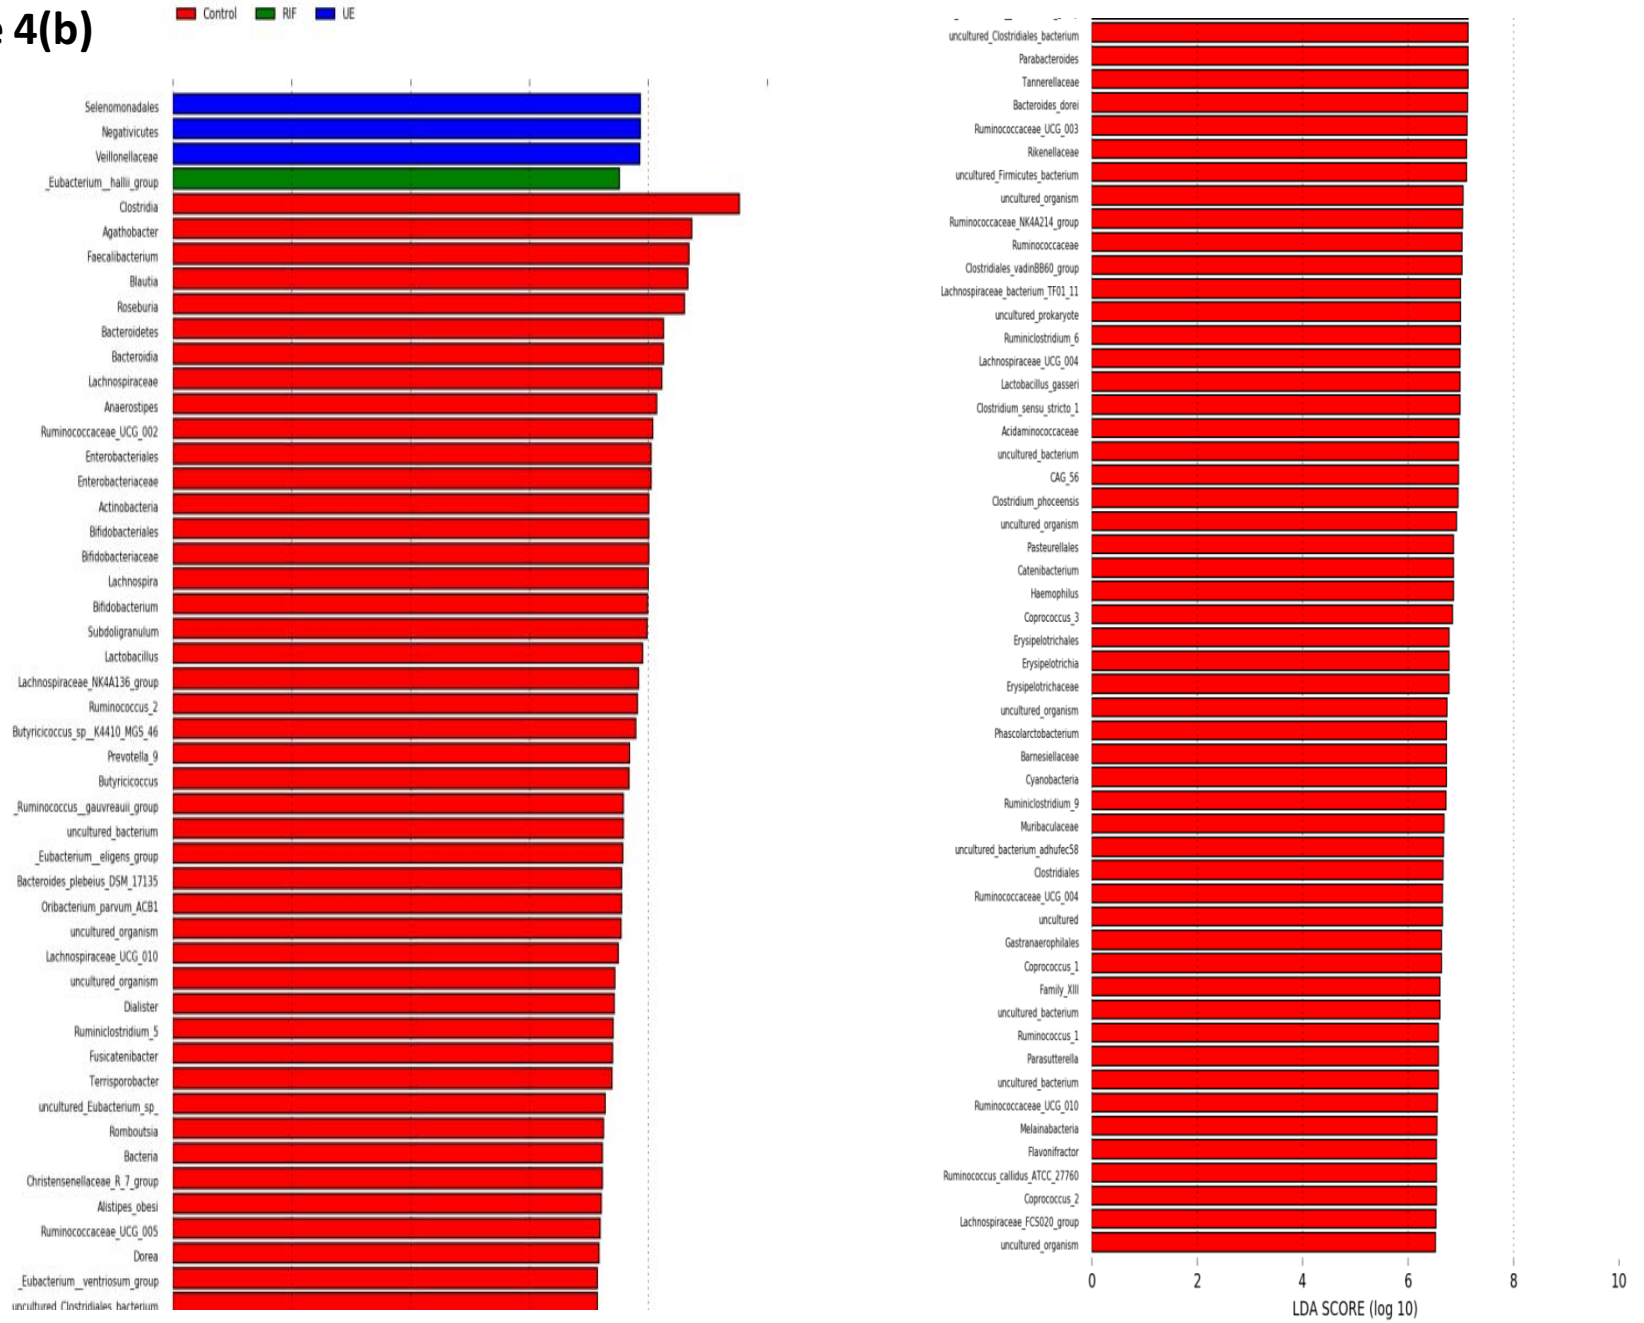

Figure 5(a)

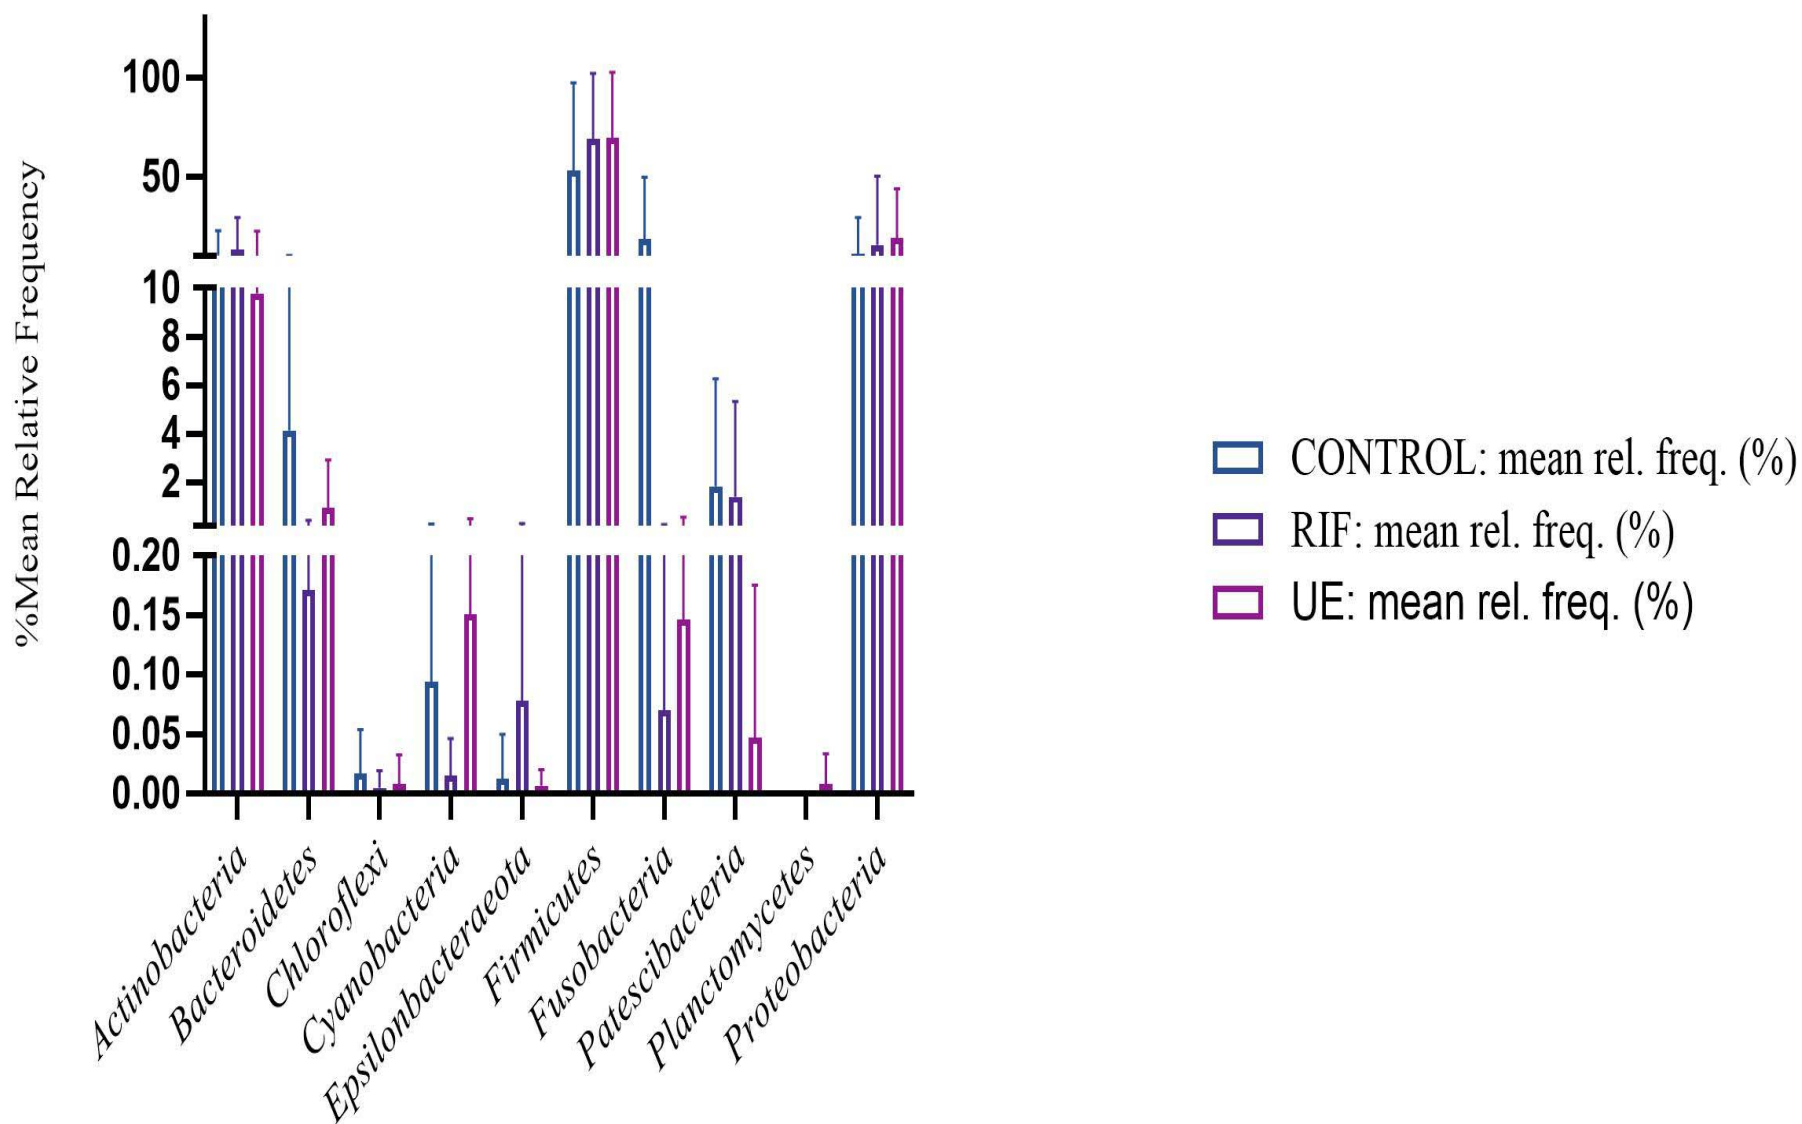

Figure 5(b)

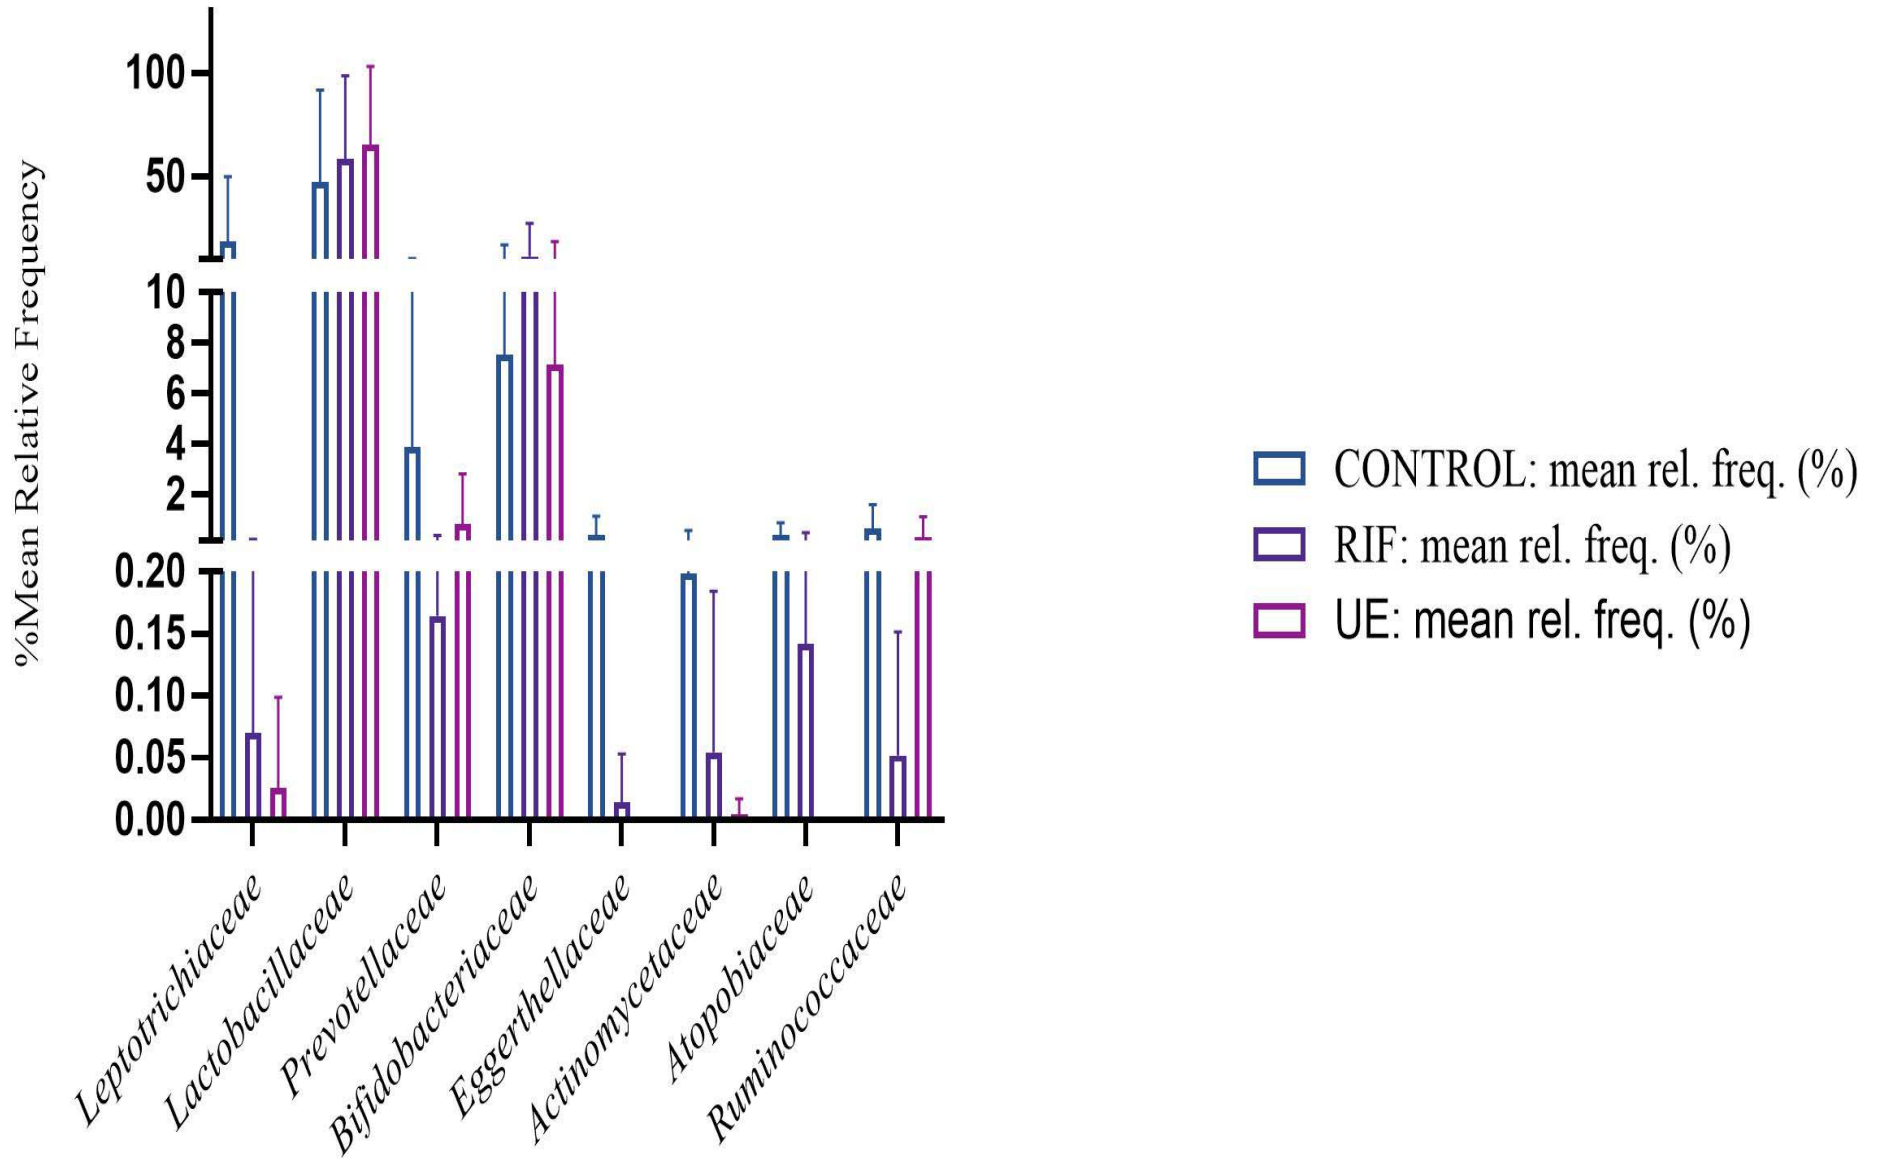

Figure 5(c)

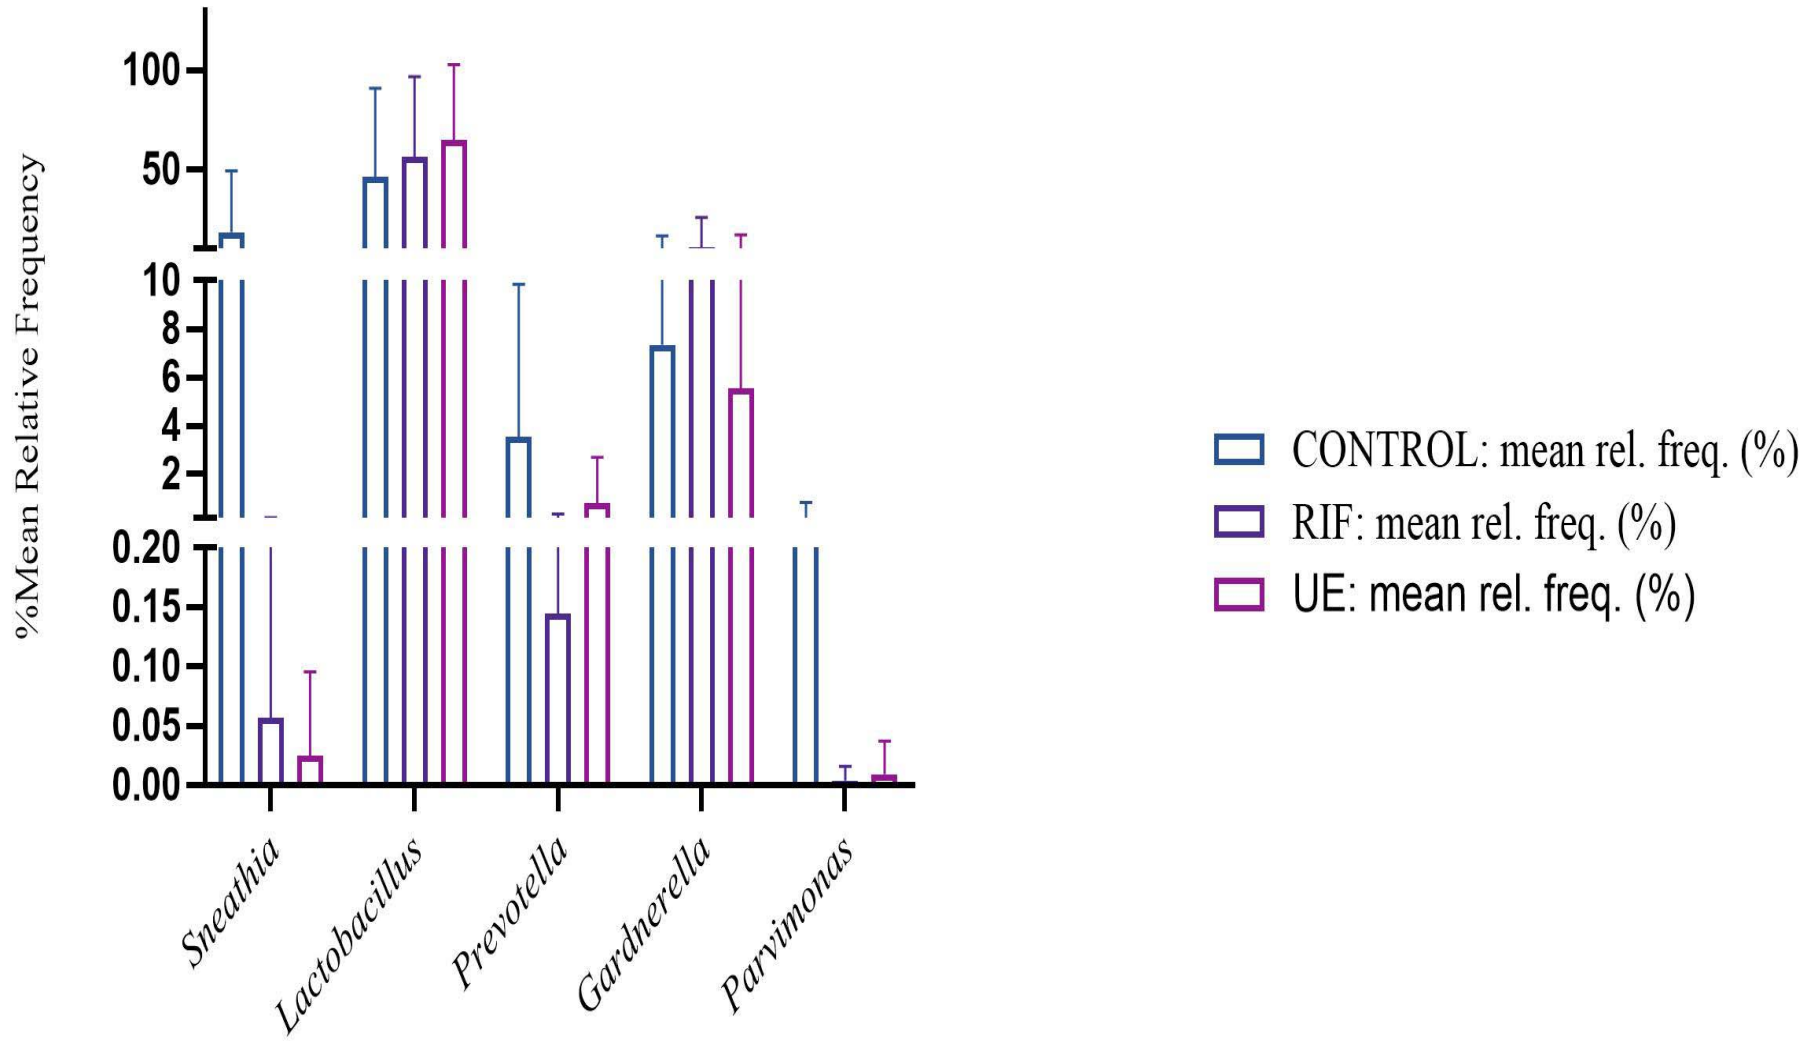

Figure 5(d)

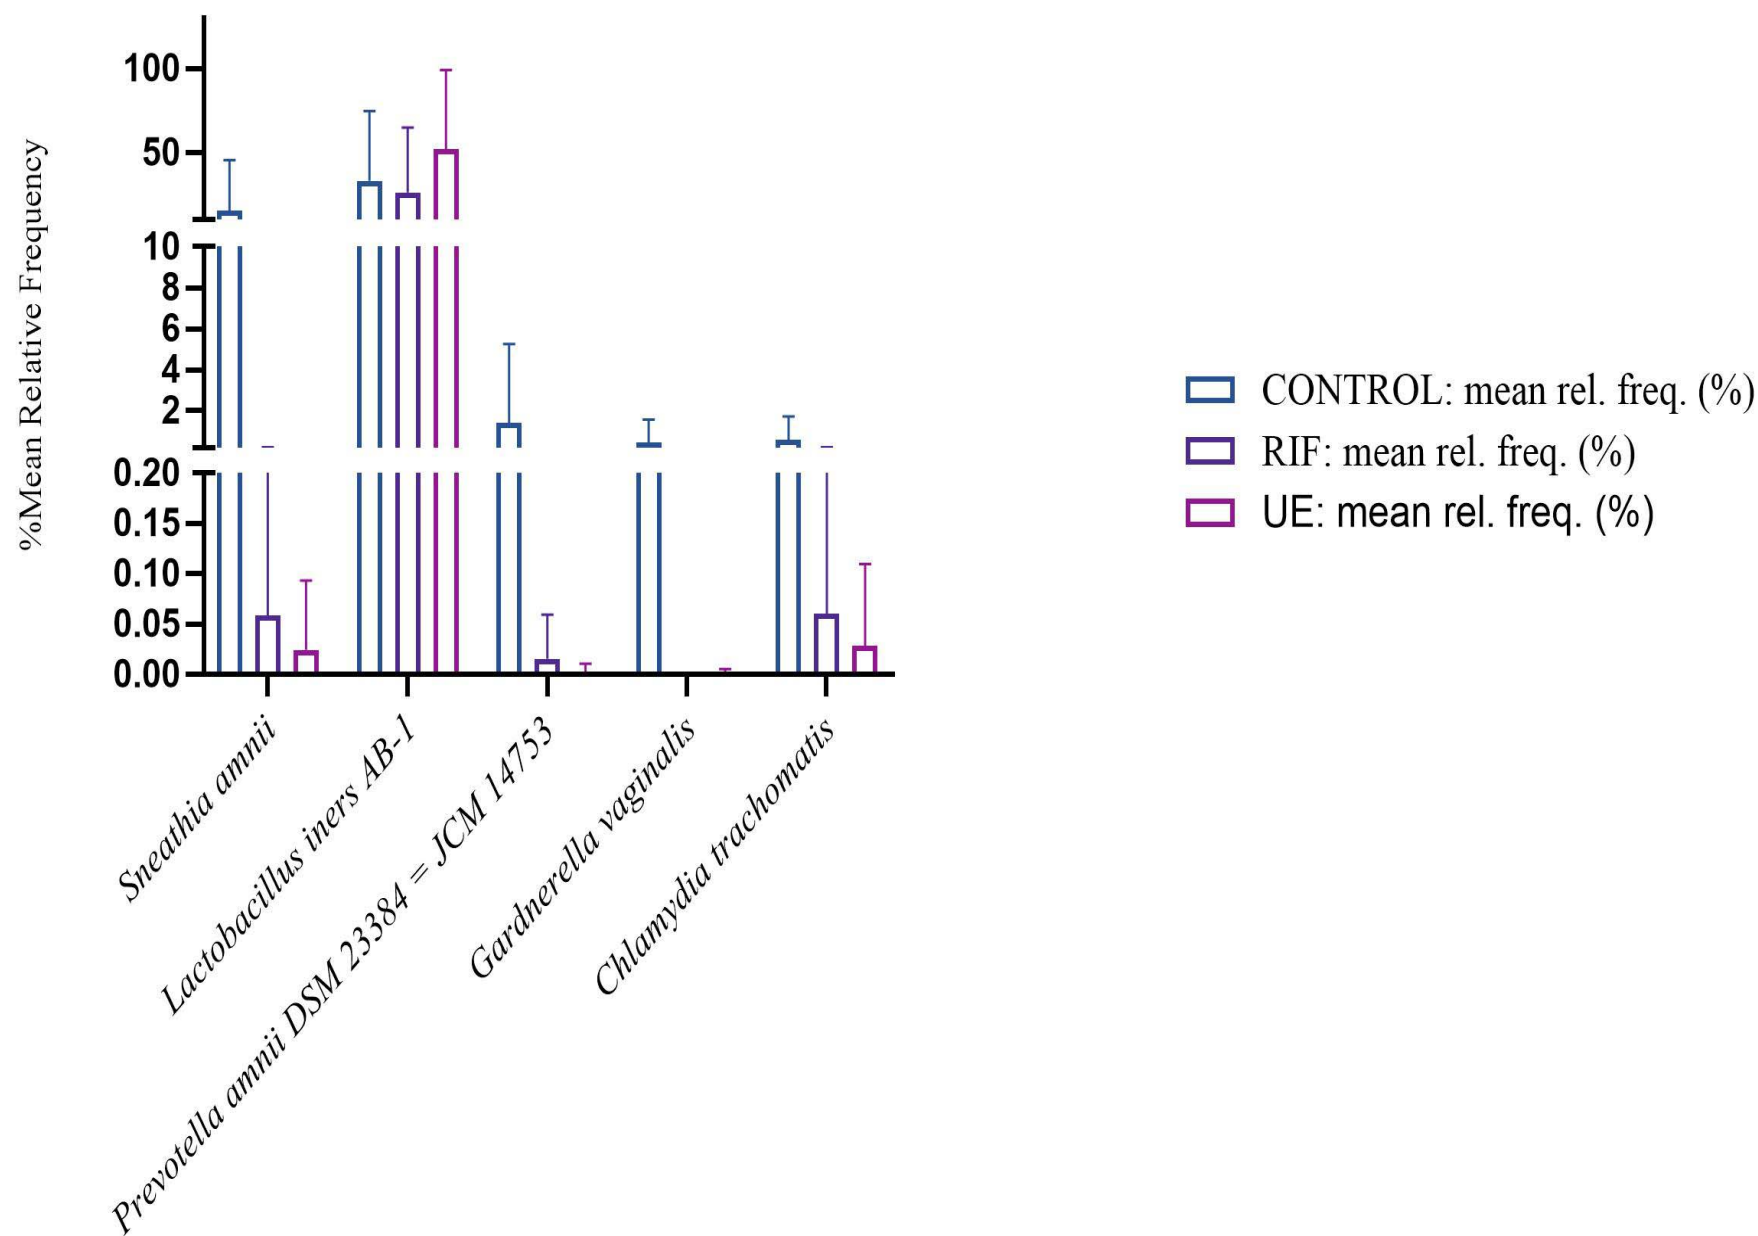

Figure 6

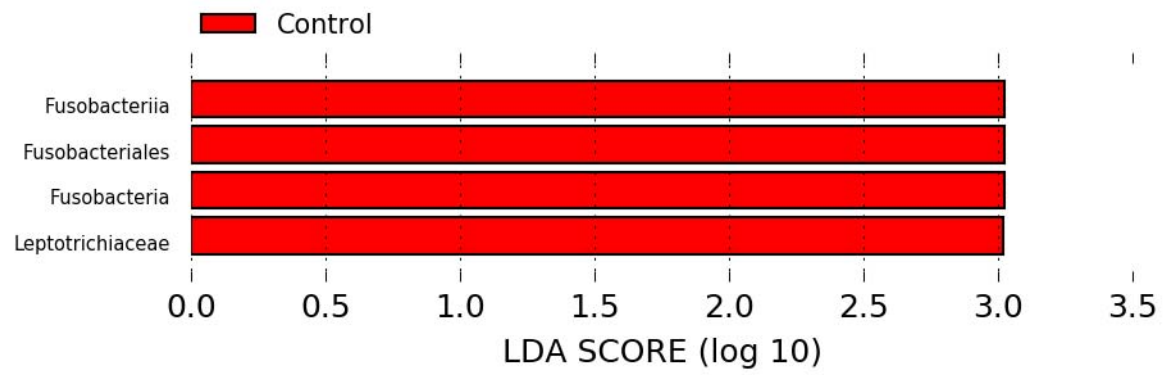



Figure 7

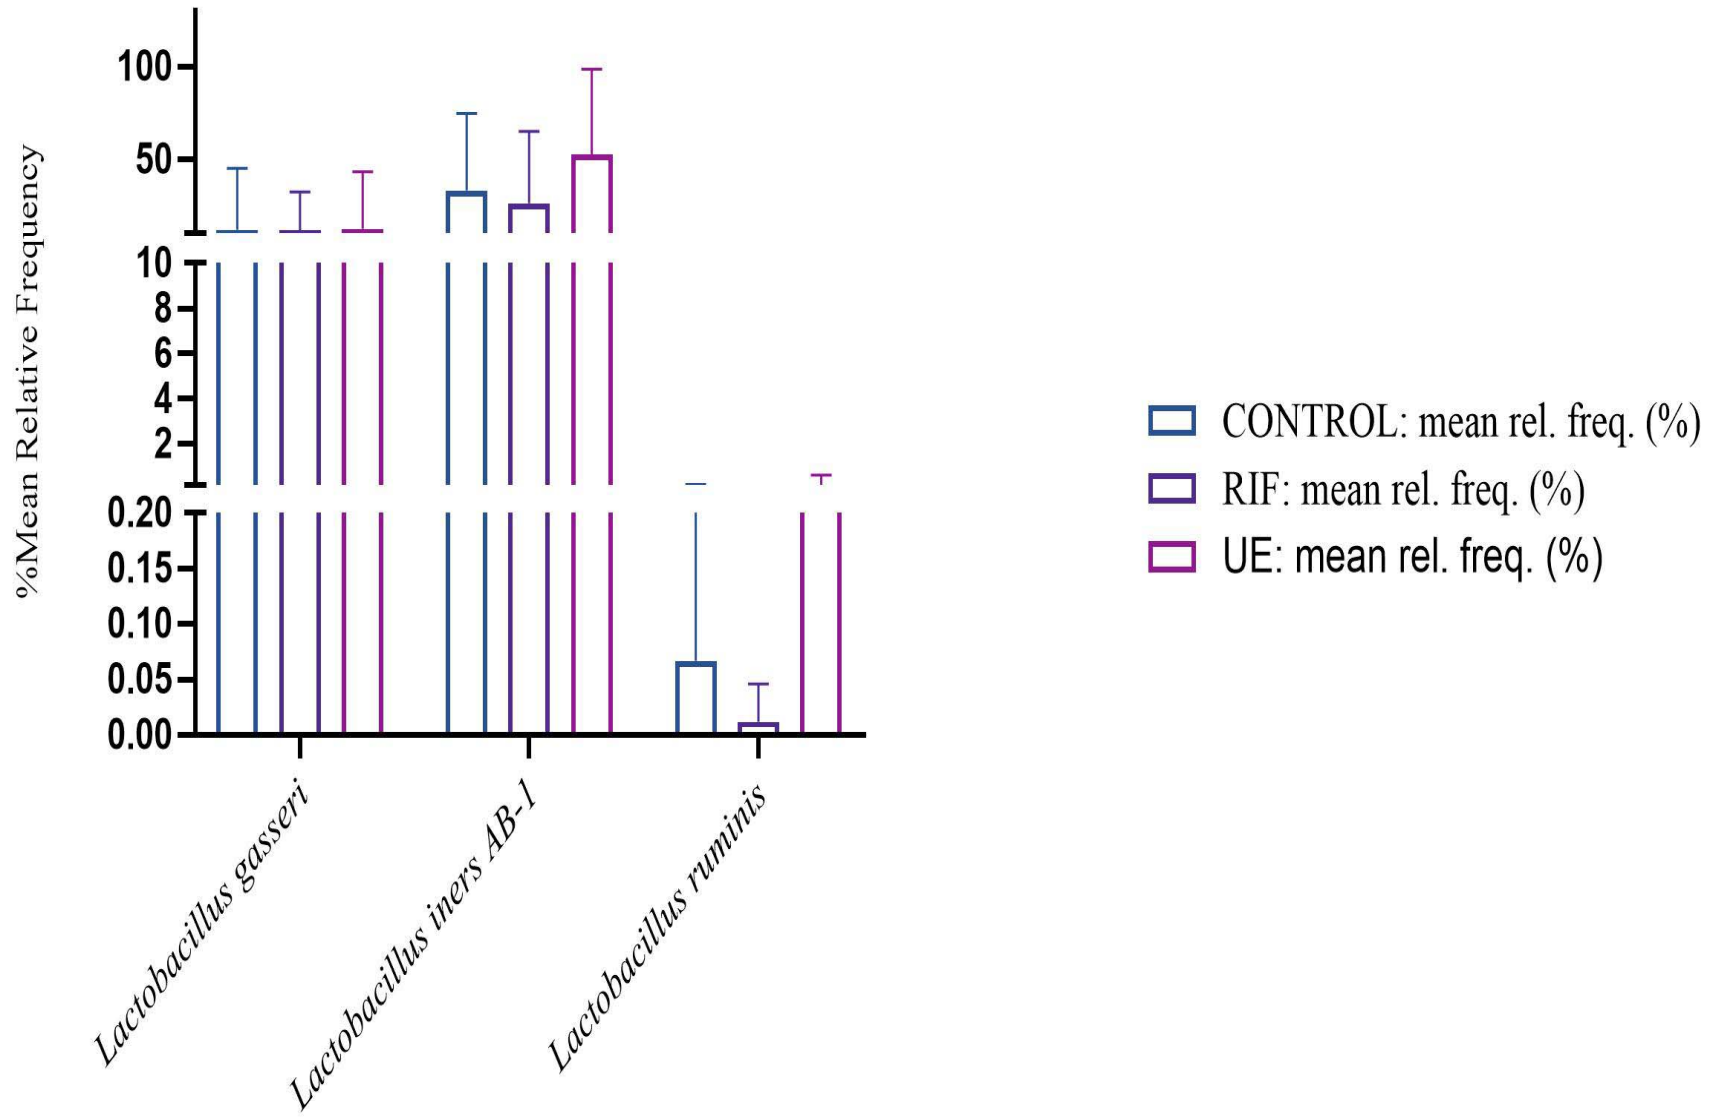

## Supplementary figures

Figure 1S(a)

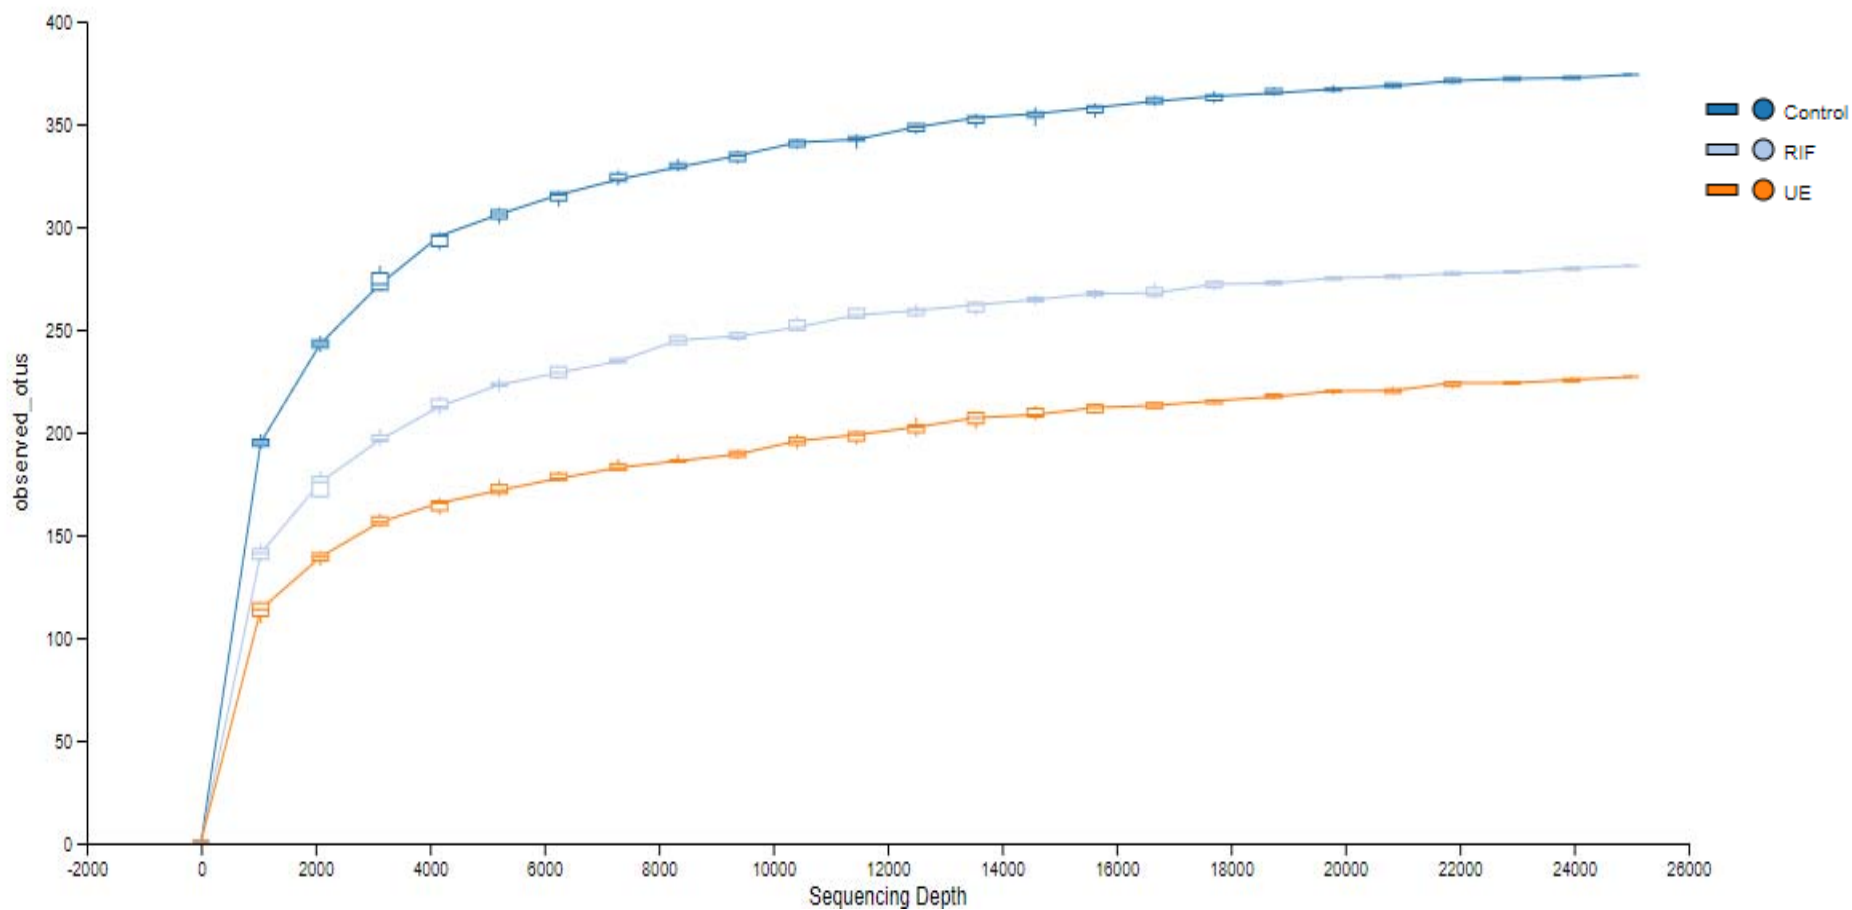

Figure 1S(b)

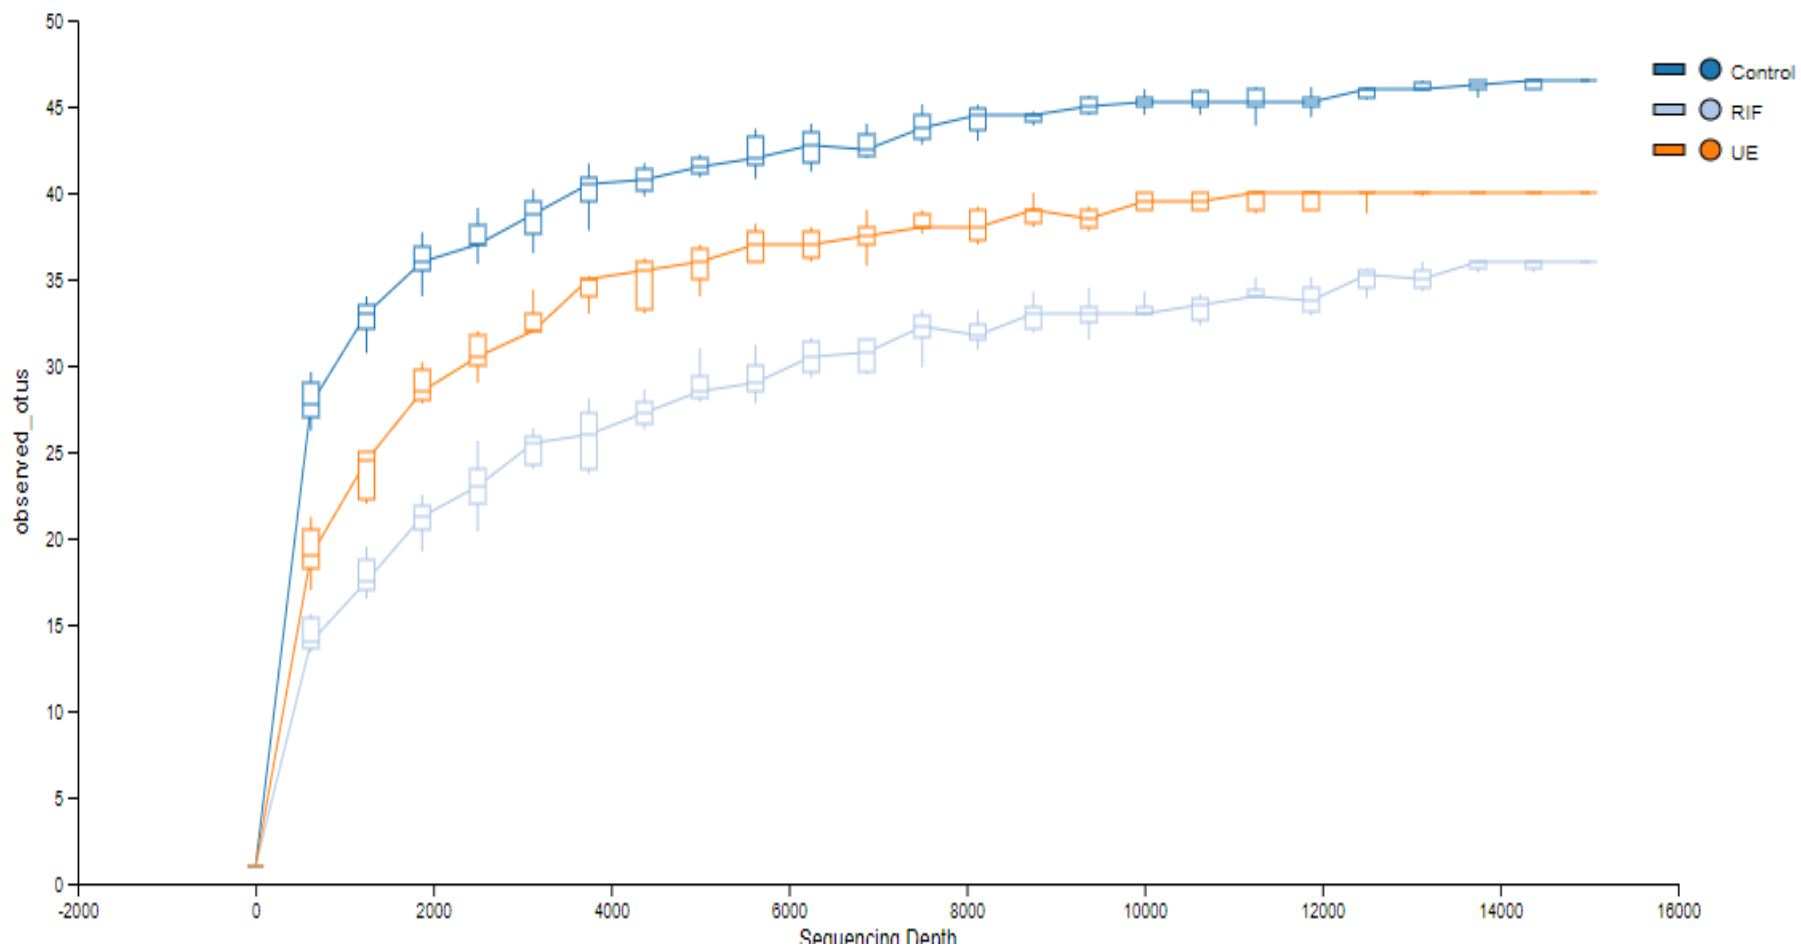

Figure 2S(a)

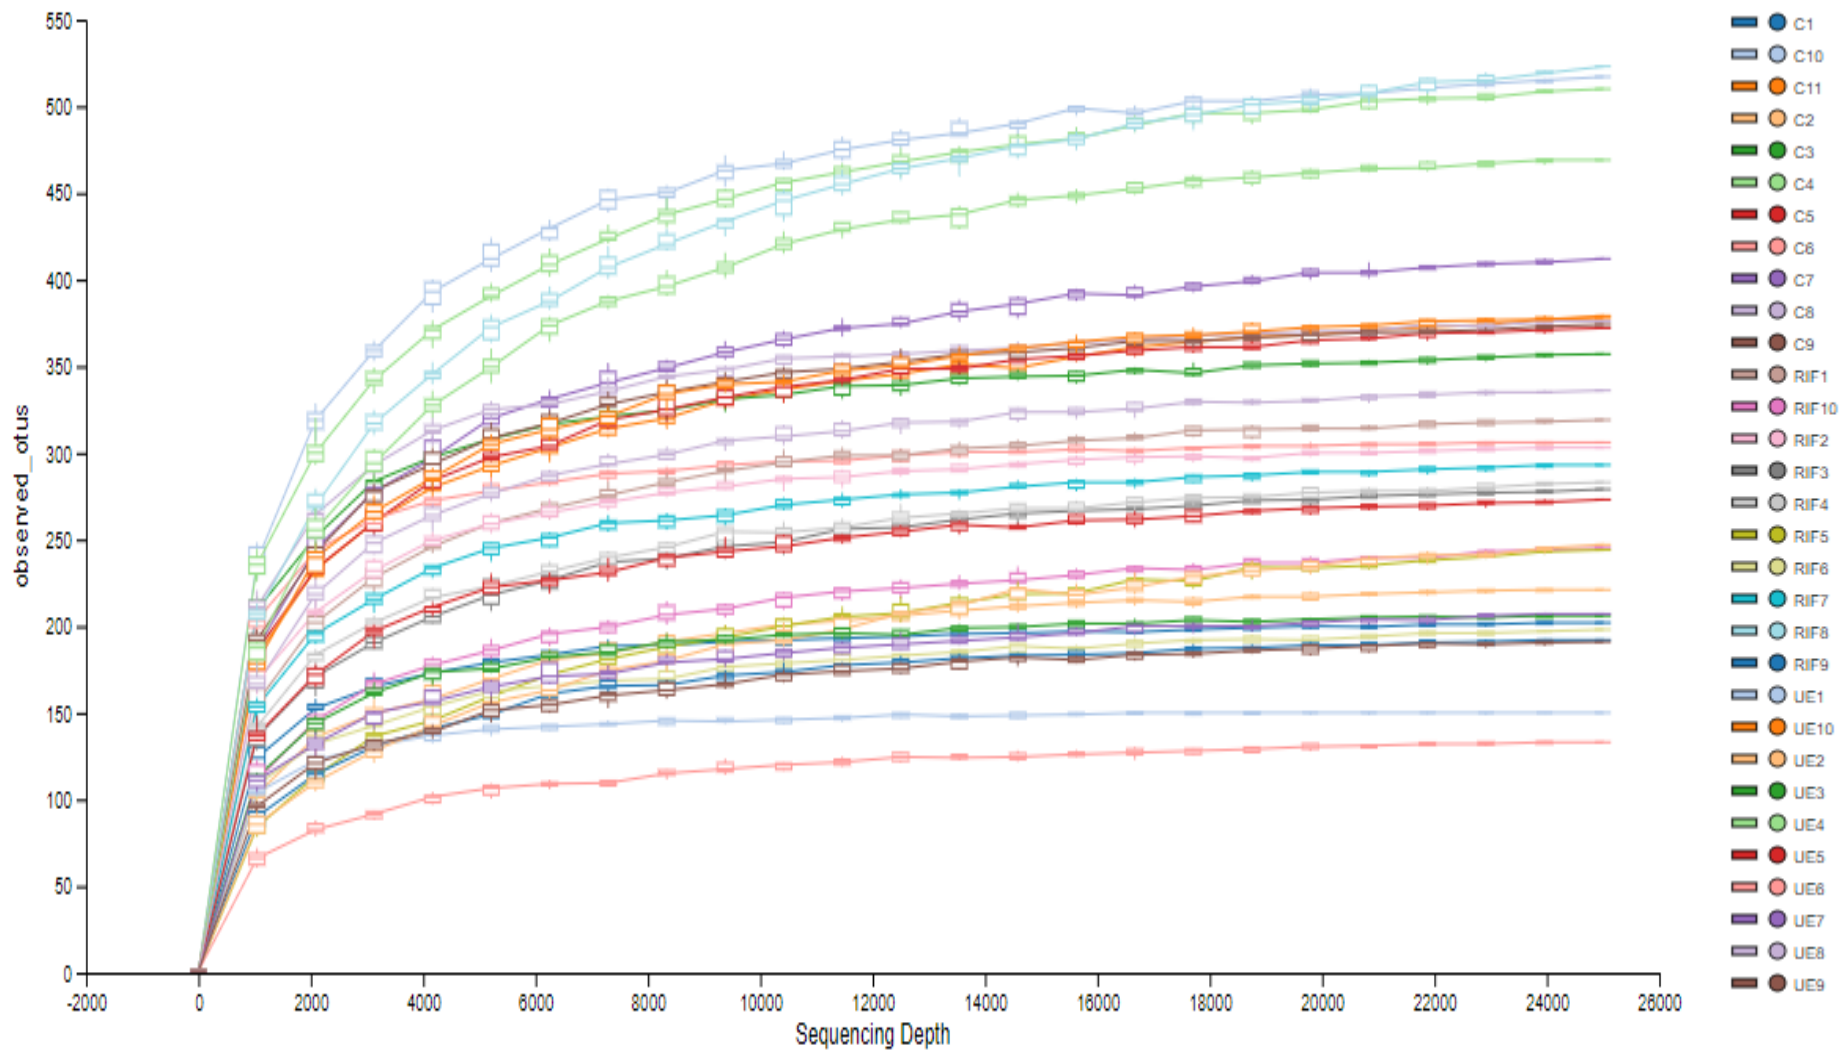

Figure 2S(b)

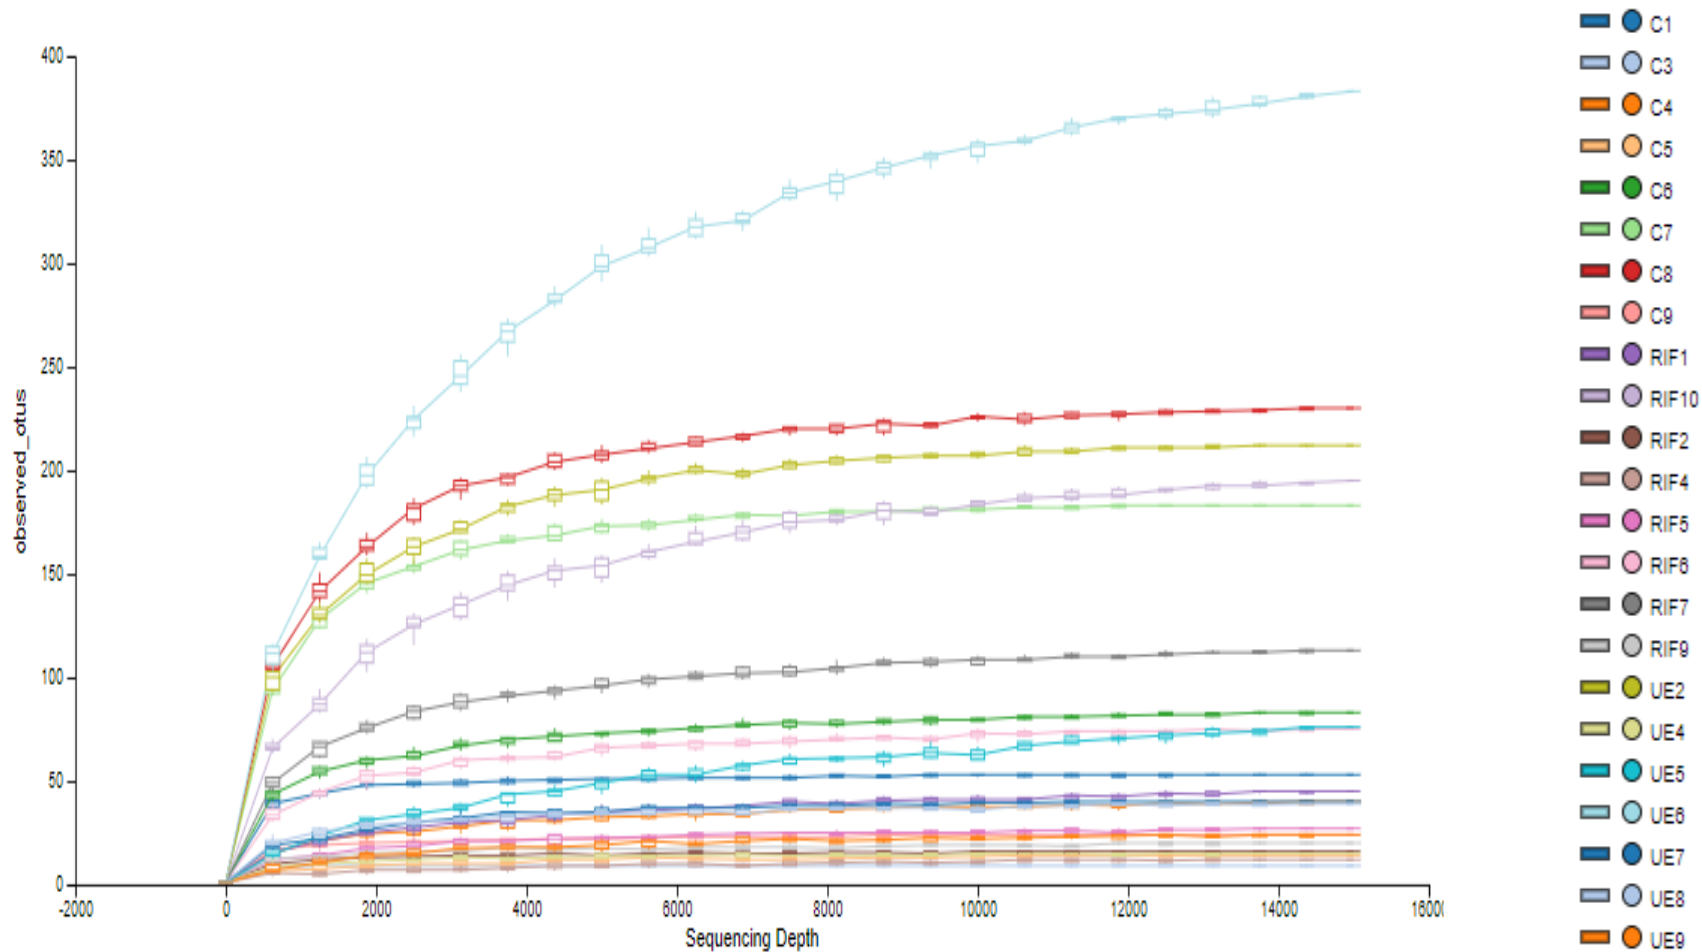

Figure 3S

Kruskal-Wallis ,  $P=0.150$ ;  $H =2.06$

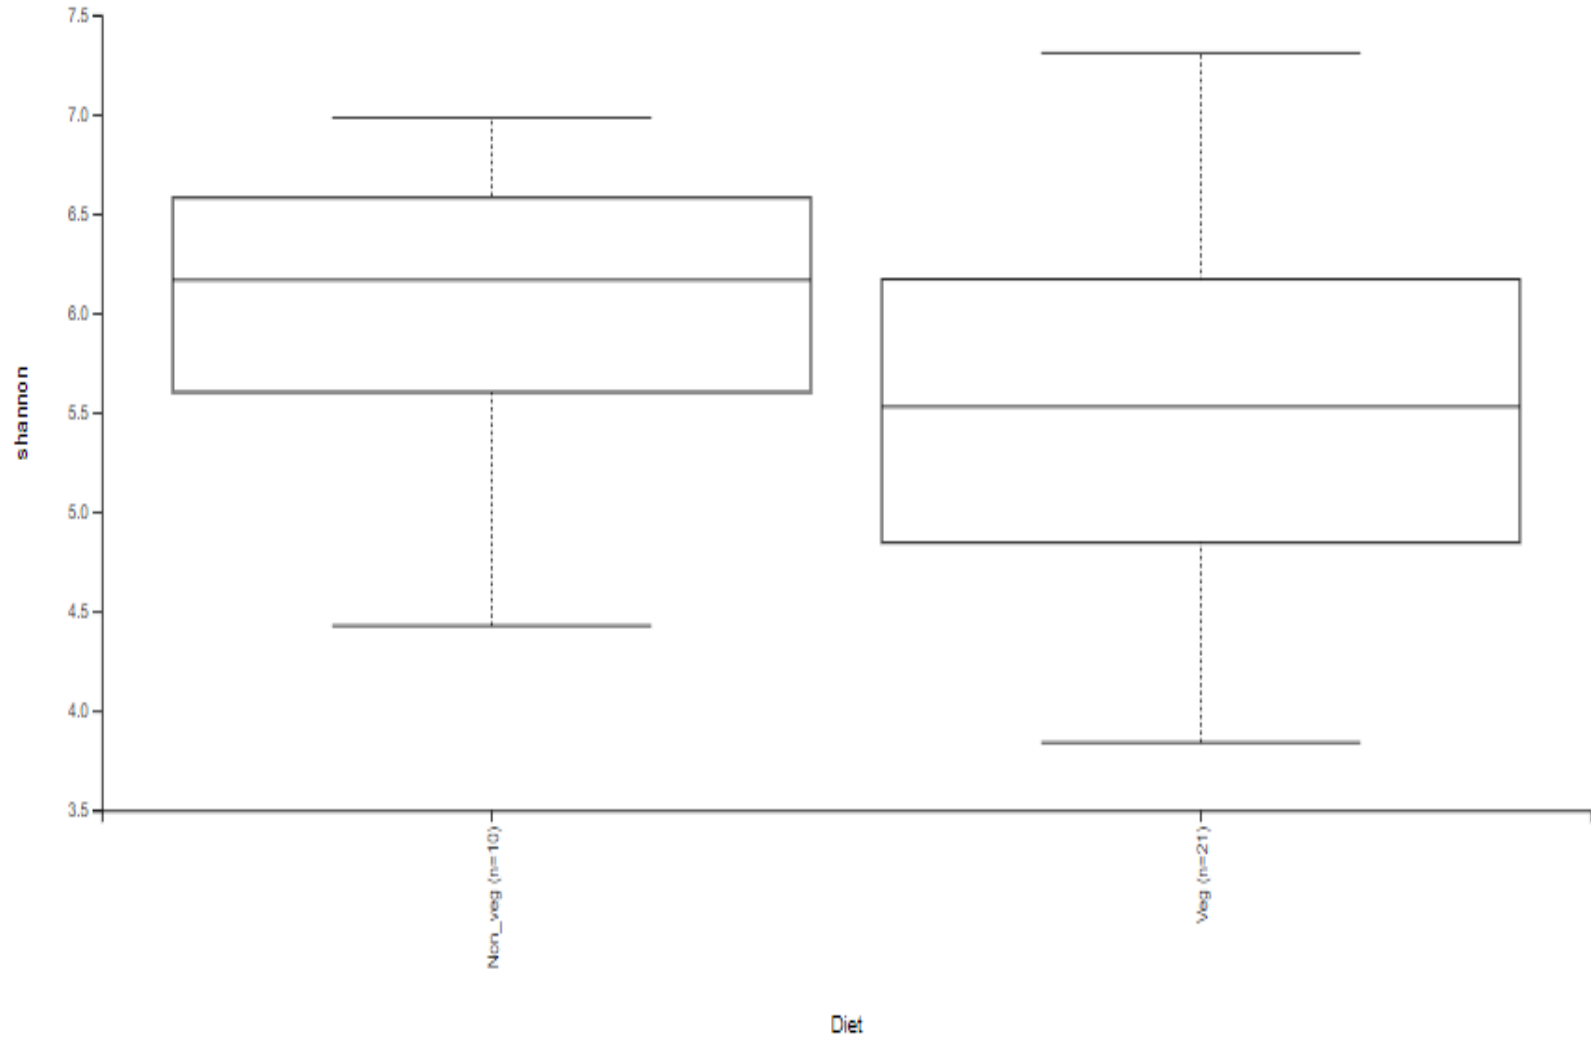

Figure 4S

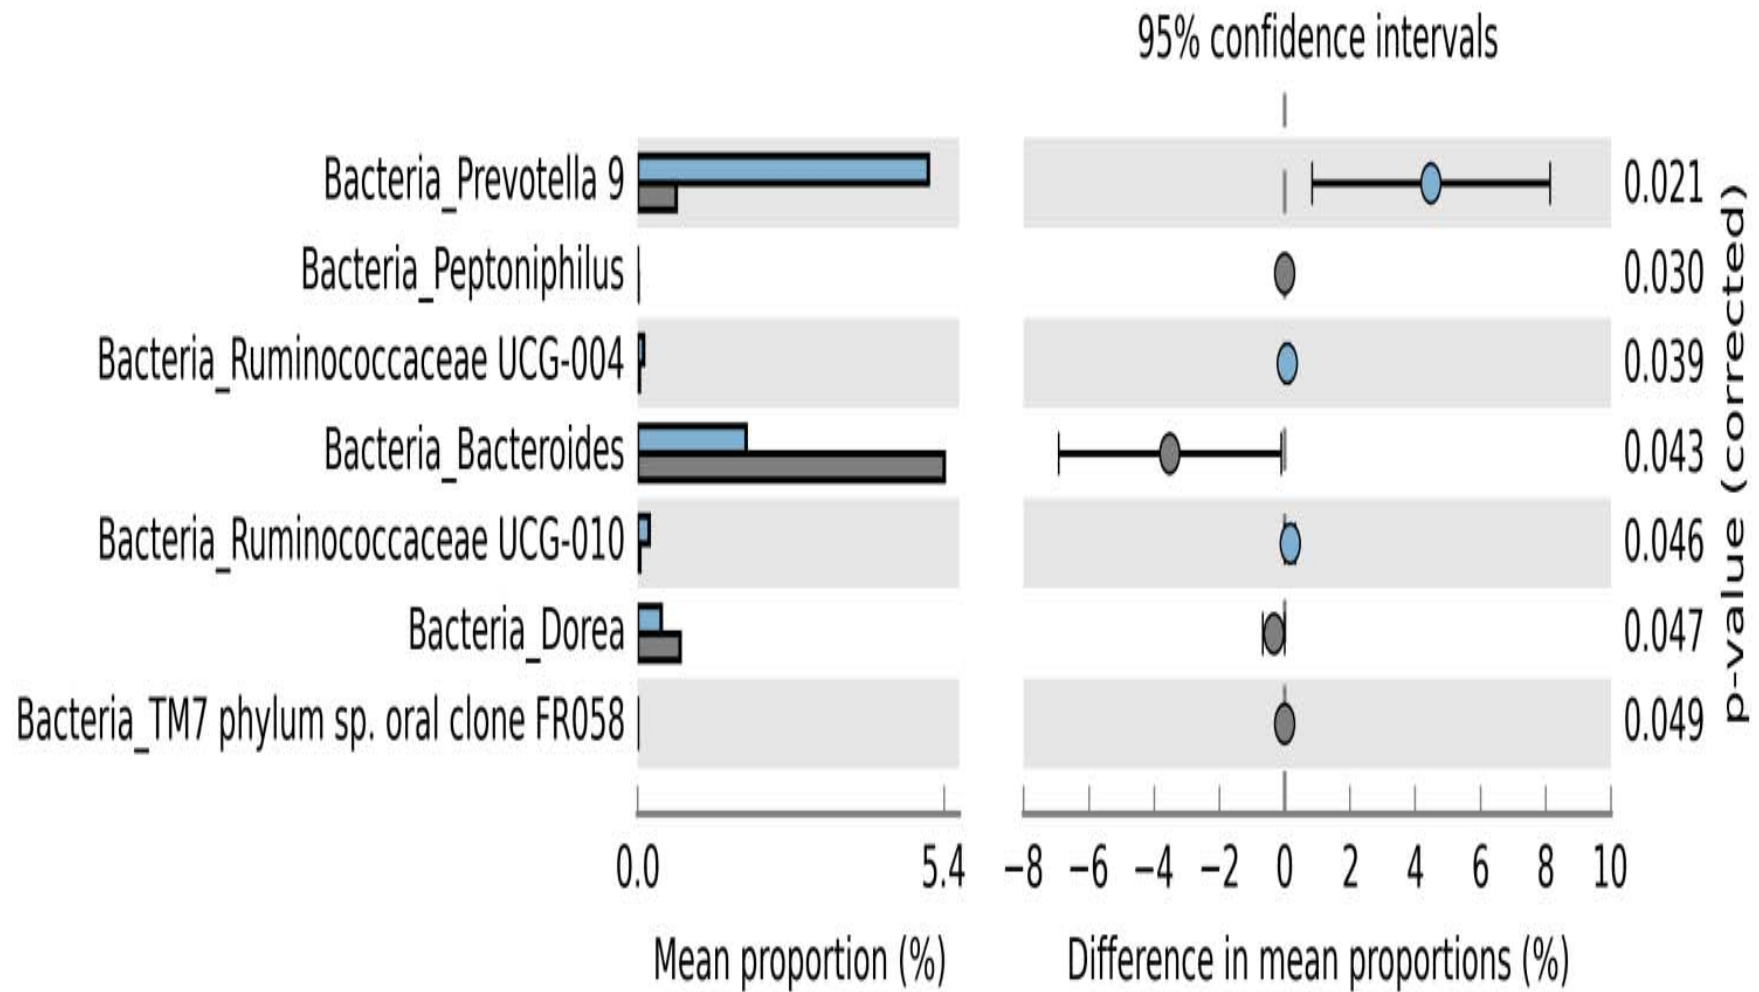

Source: https://medrxiv.org/content/medrxiv/early/2021/02/12/2021.02.09.21251410.full.pdf
